# Supplementary material for: Measurement Report: Vertically resolved Atmospheric Properties Observed over the Southern Great Plains with Uncrewed Aerial System – ArcticShark
Source: Copernicus journal article supplement (doi:10.5194/egusphere-2024-3089), 2024-11-06
Supplement: Supplementary file 1 [file egusphere-2024-3089-supplement.pdf]

# Supplementary material

## Overview plots of the ArcticShark flights in March, June and August 2023

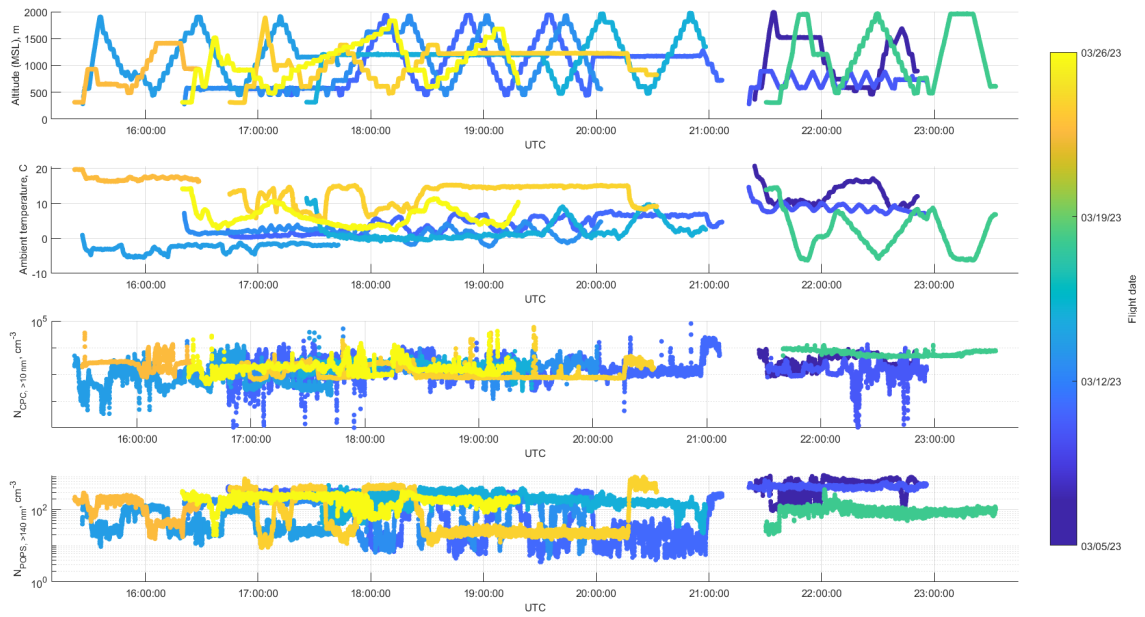

**Figure S1.** Time series representation of UAS altitude, ambient temperature, and aerosol number concentrations, colored by flight dates in March.

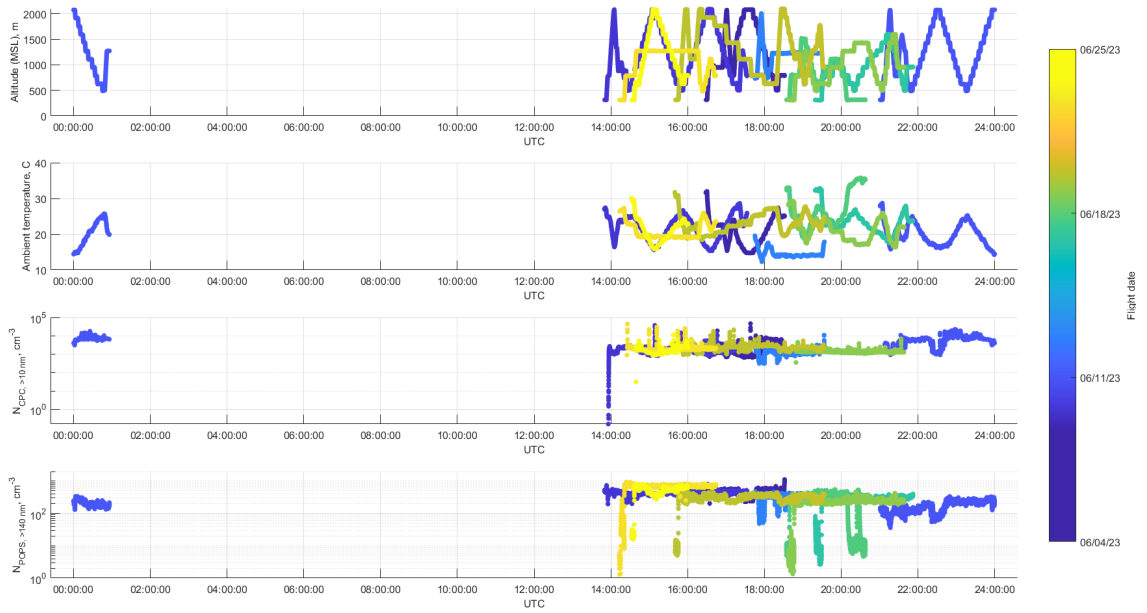

Figure S2. Time series representation of UAS altitude, ambient temperature, and aerosol number concentrations, colored by flight dates in June.

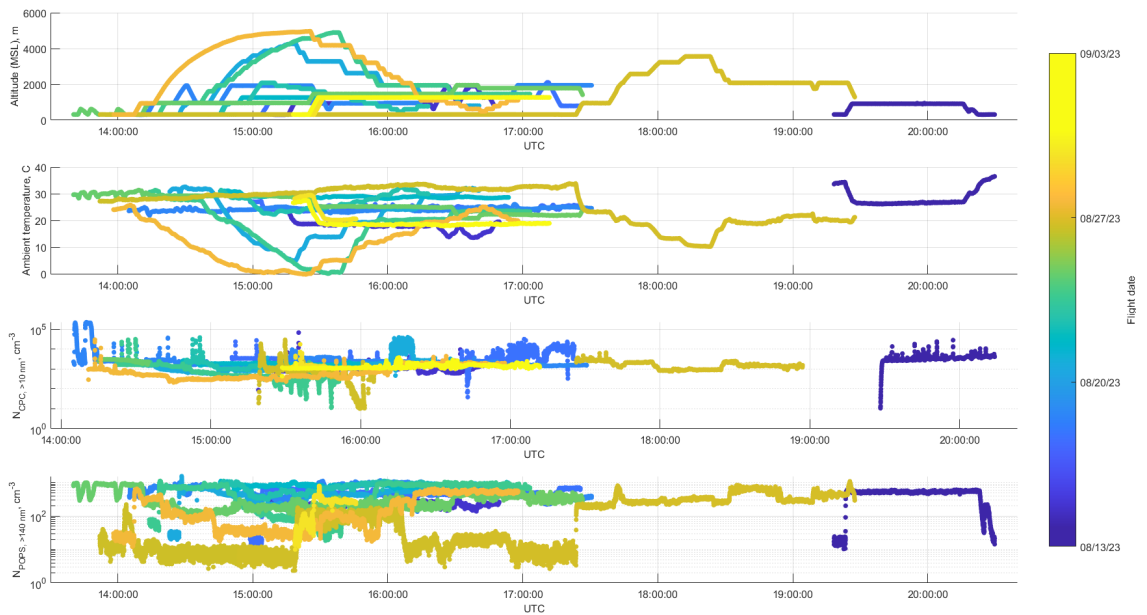

Figure S3. Time series representation of UAS altitude, ambient temperature, and aerosol number concentrations, colored by flight dates in August.

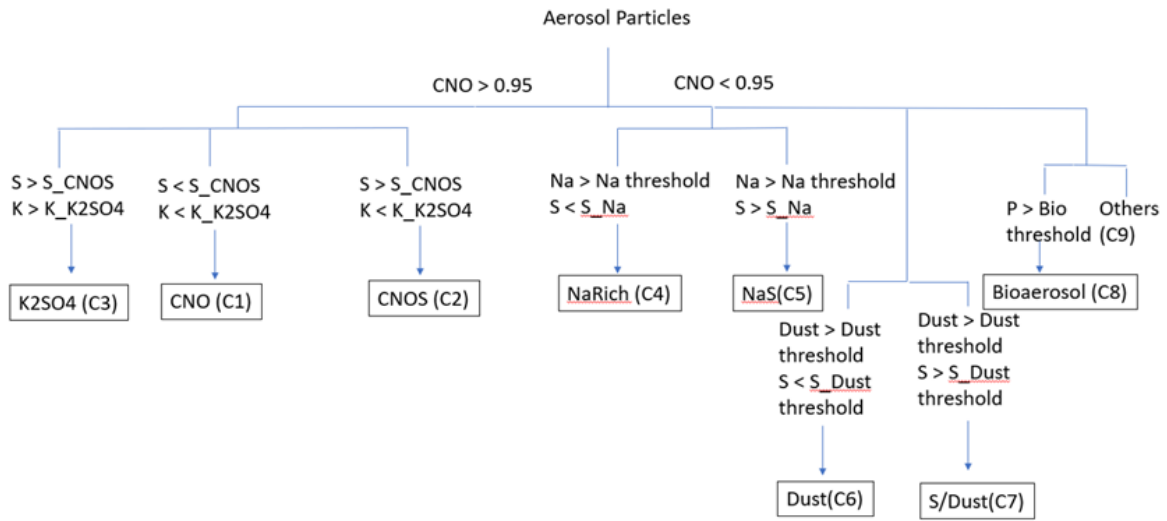

Figure S4. Particle classification scheme sorted based on the CCSEM/EDX results.

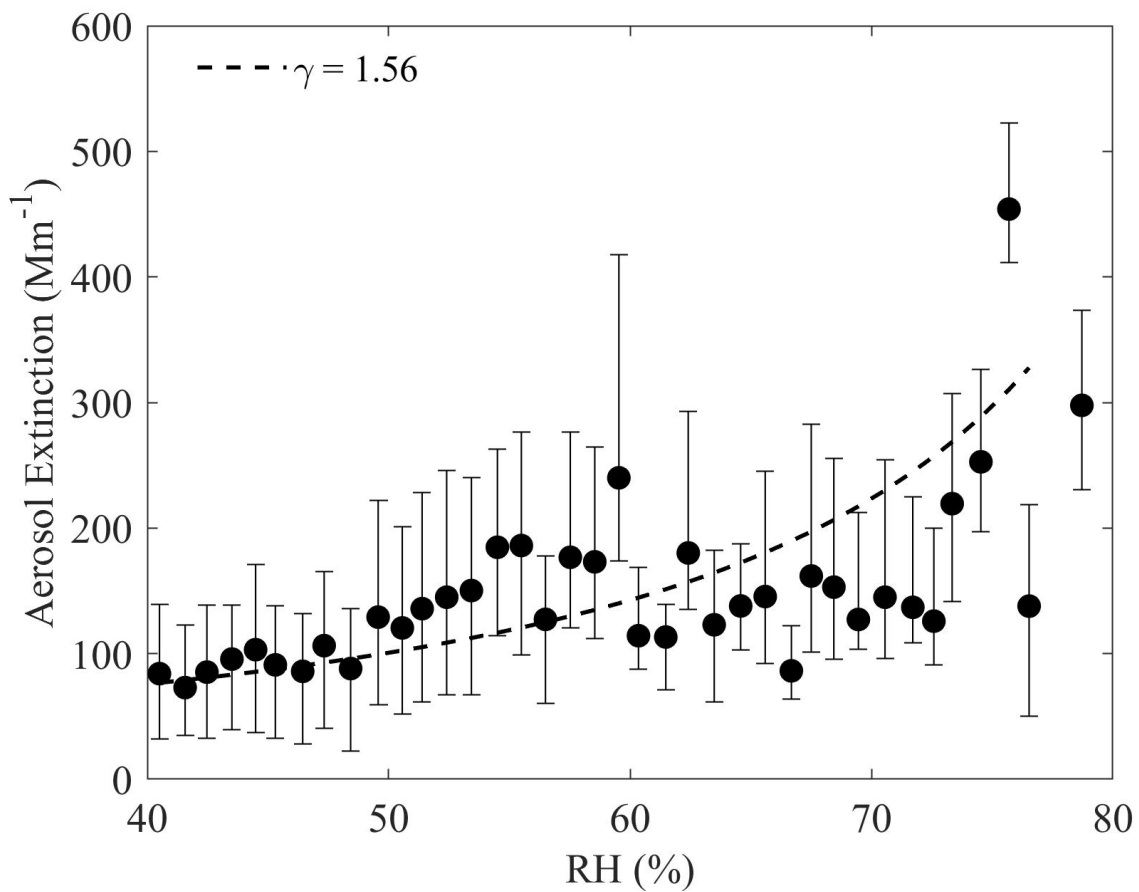

Figure S5. Humidigram of aerosol extinction at 355 nm based on the data between Aug 16 -26, 2023
