# Supplementary material for: Measurement Report: Vertically resolved Atmospheric Properties Observed over the Southern Great Plains with Uncrewed Aerial System – ArcticShark
Source: Copernicus journal article supplement (doi:10.5194/egusphere-2024-3089), 2024-11-06
Supplement: Supplementary file [file egusphere-2024-3089-RC2-supplement.pdf]

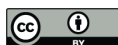

# Measurement Report: Vertically resolved Atmospheric Properties Observed over the Southern Great Plains with Uncrewed Aerial System - ArcticShark

Fan Mei<sup>1</sup>, Qi Zhang<sup>2</sup>, Damao Zhang<sup>1</sup>, Jerome D. Fast<sup>1</sup>, Gourihar Kulkarni<sup>1</sup>, Mikhail S. Pekour<sup>1</sup>,  
5 Christopher R. Niedek<sup>2</sup>, Susanne Glienke<sup>1</sup>, Israel Silber<sup>1</sup>, Beat Schmid<sup>1</sup>, Jason M. Tomlinson<sup>1</sup>, Hardeep  
S. Mehta<sup>3</sup>, Xena Mansoura<sup>3</sup>, Zezhen Cheng<sup>3</sup>, Gregory W. Vandergrift<sup>3</sup>, Nurun Nahar Lata<sup>3</sup>, Swarup  
China<sup>3</sup>, Zihua, Zhu<sup>3</sup>

<sup>1</sup>Atmospheric, Climate, and Earth Sciences, Pacific Northwest National Laboratory, Richland, WA, 99352, USA

<sup>2</sup>Department of Environmental Toxicology, University of California, Davis, 95616, USA

10 <sup>3</sup>Environmental Molecular Sciences Laboratory, Pacific Northwest National Laboratory, Richland, WA, 99352, USA

Correspondence to: Fan Mei (fan.mei@pnnl.gov)

**Abstract.** This study presents the unique capability of the DOE ArcticShark – a mid-size Uncrewed Aerial System (UAS) –  
for measuring vertically resolved atmospheric properties over the Southern Great Plains (SGP) of the United States. Focusing  
on atmospheric states and aerosol properties, we overview measurements from 32 research flights (~ 97 flight hours) carried  
15 out in 2023. Our data from March, June, and August 2023 reveal distinctive seasonal patterns within the atmospheric column  
through unique chemical composition measurements. These two measurement techniques— in situ and remote sensing—  
provide valuable insights into their consistency and complementarity. The August operations, aided by a visual observer on a  
? chase plane, allowed for extensive UAS coverage, surpassing typical UAS operation envelopes. Furthermore, we demonstrate  
the capabilities of the ArcticShark through several case studies, including the analyses of correlations between UAS-derived  
20 atmospheric profiles and conventional radiosonde measurements, as well as the derivation of vertically resolved profiles of  
aerosol chemical, optical, and microphysical properties. These case studies highlight the versatility of the ArcticShark UAS as  
a powerful tool for comprehensive atmospheric research, effectively bridging data gaps and enhancing our understanding of  
vertical atmospheric structures in the region.

## 1 Introduction

25 The Southern Great Plains (SGP) region of the United States has long been a focal point for atmospheric research due to  
its unique geographical and meteorological characteristics (Phillips and Klein, 2014; Williams et al., 2016). Extending across  
several states, including Oklahoma, Kansas, and Texas, this area offers diverse environmental conditions, making it an ideal  
location for studying various atmospheric phenomena (Sisterson et al., 2016; Song et al., 2005). This region is also susceptible  
to extreme weather events (Kelley and Ardon-Dryer, 2021; Mullens and McPherson, 2019). All of these factors led the  
30 Department of Energy (DOE) Atmospheric Radiation Measurement (ARM) Program to establish its first comprehensive



measurement site at this location in the 1990s (Sisterson et al., 2016). For 30 years, measurement capabilities at the ARM SGP observatory have kept expanding, including multiple observational platforms with comprehensive instruments for extensive atmospheric, aerosol, and cloud observations. Researchers have utilized the long-term observations from the ARM SGP observatory to gain valuable insights into the dynamics of convective systems, to enable the development of more accurate climate model simulation, and to further investigate aerosol-cloud interactions (Phillips et al., 2017; Tao et al., 2019; Zheng et al., 2020).

Moreover, the ARM SGP has been a hub for pioneering efforts in atmospheric remote sensing to provide a vertical context of atmospheric processes. Radiosondes are launched regularly to collect temperature, humidity, and pressure data at various altitudes (Berg et al., 2015; Gartzke et al., 2017). State-of-the-art instruments, such as radar systems, lidars, and advanced meteorological towers, have been deployed to capture data on the vertical structure and dynamics of the atmosphere (Dupont et al., 2011; Thorsen and Fu, 2015; Turner et al., 2016; Jensen et al., 2016; Naud et al., 2003). These capabilities have revolutionized ARM's ability to monitor and analyze atmospheric processes, from boundary layer evolution to cloud microphysics (Dupont et al., 2011; Kennedy et al., 2014; Ou et al., 2002; Riedi et al., 2001; Zhang et al., 2013). Although the continuous monitoring of boundary layer dynamics, along with specific aerosol and cloud vertical properties provided by radiosondes and remote sensing measurements, provides valuable data, these methods have certain limitations, such as reduced vertical measurement accuracy due to dense clouds and heavy aerosol pollution and insufficient spatial and temporal resolution (Balsamo et al., 2018; Geerts et al., 2018; Rahman, 2023).

Airborne measurements offer crucial insights into the dynamic interactions within Earth's atmosphere due to their extensive spatial coverage, high vertical resolution, and flexibility (Wendisch and Brenguier, 2013). In the past decades, the SGP observatory has functioned as a central hub, facilitating numerous field studies for collaborative research involving ground and airborne measurements (Andrews et al., 2004; Delle Monache et al., 2004; Feingold et al., 2006; Knobelspiesse et al., 2008; Vogelmann et al., 2012; Biraud et al., 2013; Turner et al., 2014; Endo et al., 2015; Lu et al., 2016; Fast et al., 2019; Schobesberger et al., 2023). During these field campaigns, research aircraft were deployed to conduct intensive observations. The airborne platforms carried specialized instruments at various altitudes to capture detailed information on atmospheric properties in the SGP region, such as seasonal differences in the vertical profiles of aerosol optical properties (Andrews et al., 2011). The presence of varied land cover, including agricultural fields, grasslands, and urban areas, also offers an excellent opportunity for examining land-atmosphere interactions and understanding how different surfaces influence local weather patterns, energy fluxes, and greenhouse gas exchanges (Fast et al., 2022; Fast et al., 2019; Parworth et al., 2015; Tao et al., 2019; Wang et al., 2023; Zheng et al., 2020).

Anchored at the SGP observatory, the ARM program has continually expanded its capabilities by developing various observational platforms to support the science community. To improve the current understanding of cloud-aerosol interactions, radiative processes, and the impacts of aerosols on both regional and global climate, the ARM program has enhanced its capabilities by incorporating tethered balloon systems and UAS alongside traditional (crewed) aircraft since 2017 (Creamean et al., 2021; Dexheimer et al., 2019; Mei et al., 2022). The ARM Aerial Facility (AAF) has successfully transitioned a mid-

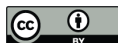

65 size UAS ~~is~~ the ArcticShark, from test flights to an operational platform available to community users  
(<https://arm.gov/news/facility/post/97628>). The ArcticShark offers flexibility, cost-effectiveness, and operational advantages.  
It is highly suitable for supporting the DOE mission to enhance our understanding of atmospheric processes and enable more  
precise and comprehensive environmental monitoring.

This paper introduces a novel dataset of airborne measurements collected in 2023 above the central facility of the ARM  
70 SGP observatory using the ArcticShark UAS. The study employed various flight patterns to optimize the integration of ground-  
based and UAS-borne instruments, focusing on vertically resolved aerosol properties in the SGP region. By combining ARM's  
UAS capabilities with the established ground-based remote sensing data, this research provides a unique dataset that enables  
the scientific community to explore atmospheric vertical structures in unprecedented detail. Additionally, insights into aerosol  
chemical properties at higher altitudes can be obtained through innovative analyses of particle samples collected during UAS  
75 deployments. Overall, with its ability to conduct long-duration flights and carry multiple payloads, the ArcticShark  
successfully bridged observational gaps and showed great potential to enhance our understanding of vertical atmospheric  
structures. This integration of UAS and ground-based measurements represents a significant advancement in atmospheric data  
collection, particularly for studying aerosols and their impacts on weather and climate.

*great introduction*

## 2 Data and Measurements

### 80 2.1 ArcticShark in situ measurements

*say how big? wing span & specify that its fixed wing*

The ArcticShark is an advanced mid-size UAS supported by the DOE ARM program to conduct atmospheric research  
(<https://www.arm.gov/guidance/campaign-guidelines/arcticshark>). The ArcticShark can carry a scientific payload of up to 45  
kg (~100 lbs), which can include a variety of meteorological, aerosol, trace-gas, and cloud instruments. The ArcticShark can  
reach altitudes of up to 5,500 m and has a flight duration of up to 8 hours. This operation range enables data collection over a  
85 large spatial area and extended periods, providing a detailed picture of the atmospheric state. The ArcticShark was intensively  
operated by the AAF in March, June, and August of 2023, allowing for comprehensive data collection above the ARM SGP  
observatory and contributing valuable data to the scientific community. Throughout three deployments, the AAF engineering  
and science flights primarily aimed to comprehend the flight operation envelope and determine the optimal operational  
parameters. Additionally, these flights carried out the scientific measurements of thermodynamic, aerosol, and land-surface  
90 properties and the exploration of various flight patterns to effectively address various scientific questions.

The ArcticShark has an interior payload bay of around 85 Liters and four underwing-mounted pylons to carry these  
various instrument packages. It provides 2500 W of electrical power specifically for operating the scientific payloads, enabling  
the integration of multiple sensors simultaneously. The typical measurements include atmospheric state and thermodynamic  
properties (temperature, humidity, pressure, and 3-D wind components), aerosol (total number concentration, size distribution,  
95 optical properties, and chemical compositions) and cloud measurements, atmospheric gases (water vapor and carbon dioxide  
concentrations), and land surface monitoring (infrared surface temperature and multispectral images) (Mei et al., 2022; Mei et



100 al., 2024) (detailed in Table 1). Although the typical measurements acquire data at a 1 Hz sampling rate, the ArcticShark is also equipped with the advanced meteorological instrument, the Airborne Inertial Measurement and Meteorological System (AIMMS-30), to provide high-frequency measurements. <sup>of what?</sup> The AIMMS-30 was tested and calibrated under specific maneuver flight patterns to ensure the accuracy and reliability of the data collected during the first flight of each mission. With the calibration flight and appropriate post-processing, ArcticShark can provide wind data at a rate of 100 Hz to the scientific community (DOI: 10.5439/2204047), which can be used to derive further turbulence parameters, such as turbulence kinetic energy (TKE). Before and after each deployment, the aerosol instruments were calibrated in the lab to ensure counting efficiency and sizing accuracy. During deployment, their performance was checked against AAF standard instruments to maintain data consistency and high-quality results (Mei et al., 2022).

**Table 1. DOI information of ArcticShark and VAPs datasets**

→ add what variables are included specifically

| ARM data product                    | Description                                                                       | DOI                                                                           |
|-------------------------------------|-----------------------------------------------------------------------------------|-------------------------------------------------------------------------------|
| aafh2o (Burk et al., 2023a)         | Airborne measurements of H2O concentrations                                       | <a href="https://doi.org/10.5439/1821160">https://doi.org/10.5439/1821160</a> |
| aafirt (Burk et al., 2023b)         | Infrared Thermometer (IRT) on airborne platform                                   | <a href="https://doi.org/10.5439/1821129">https://doi.org/10.5439/1821129</a> |
| aafnav (Mei et al., 2023a)          | ARM Aerial Facility (AAF) Navigation (NAV) Datastream                             | <a href="https://doi.org/10.5439/1339718">https://doi.org/10.5439/1339718</a> |
| aafnavvec (Mei et al., 2023b)       | ARM Aerial Facility (AAF) VectorNav, VN-200, GPS-Aided Inertial Navigation System | <a href="https://doi.org/10.5439/1238153">https://doi.org/10.5439/1238153</a> |
| aafmcpc (Burk et al., 2023c)        | Unmanned Aircraft Systems, Mixing Condensation Particle Counter                   | <a href="https://doi.org/10.5439/1820906">https://doi.org/10.5439/1820906</a> |
| aafpops (Mei et al., 2023c)         | Portable Optical Particle Counter                                                 | <a href="https://doi.org/10.5439/2322345">https://doi.org/10.5439/2322345</a> |
| aafstap (Gibler et al., 2023a)      | Single Channel Tricolor Absorption Photometer                                     | <a href="https://doi.org/10.5439/1838697">https://doi.org/10.5439/1838697</a> |
| aafmetaims100hz (Mei et al., 2023d) | Integrated Meteorological Measurement System (AIMMS) - 100 Hz Meteorological data | <a href="https://doi.org/10.5439/2204047">https://doi.org/10.5439/2204047</a> |
| aaffiltsamp (Burk et al., 2023d)    | Unmanned Aircraft Systems, Filter Sampler                                         | <a href="https://doi.org/10.5439/1821176">https://doi.org/10.5439/1821176</a> |
| aafmopc (Gibler et al., 2023b)      | Miniaturized Optical Particle Counter                                             | <a href="https://doi.org/10.5439/1838698">https://doi.org/10.5439/1838698</a> |
| aafnavaims (Cristina et al., 2023)  | Integrated Meteorological Measurement System (AIMMS) - Navigation data            | <a href="https://doi.org/10.5439/1238157">https://doi.org/10.5439/1238157</a> |



|                                     |                                                                                                                                                        |                                                                               |
|-------------------------------------|--------------------------------------------------------------------------------------------------------------------------------------------------------|-------------------------------------------------------------------------------|
| aafmetaims (Koontz et al., 2023)    | Integrated Meteorological Measurement System (AIMMS) - Meteorological data                                                                             | <a href="https://doi.org/10.5439/1349241">https://doi.org/10.5439/1349241</a> |
| aaftrh (Burk et al., 2023e)         | Temperature and Relative Humidity                                                                                                                      | <a href="https://doi.org/10.5439/1820905">https://doi.org/10.5439/1820905</a> |
| aafcdp (Gibler et al., 2023c)       | Cloud Droplet Probe                                                                                                                                    | <a href="https://doi.org/10.5439/1561461">https://doi.org/10.5439/1561461</a> |
| aafnavaims100hz (Mei et al., 2023e) | Integrated Meteorological Measurement System (AIMMS) - 100 Hz Navigation data                                                                          | <a href="https://doi.org/10.5439/2204048">https://doi.org/10.5439/2204048</a> |
| cldtype (Zhang et al., 2023)        | Cloud Type Classification                                                                                                                              | <a href="https://doi.org/10.5439/1349884">https://doi.org/10.5439/1349884</a> |
| mplemaskml (Cromwell et al., 2023)  | Micropulse Lidar cloud mask using machine learning model from Cromwell et. al 2019                                                                     | <a href="https://doi.org/10.5439/1637940">https://doi.org/10.5439/1637940</a> |
| ceilpblht (Morris et al., 2023)     | Ceilometer (CEIL): planetary boundary-layer heights                                                                                                    | <a href="https://doi.org/10.5439/1095593">https://doi.org/10.5439/1095593</a> |
| pblhtrl1zhang (Zhang et al., 2023)  | Planetary Boundary Layer derived from Raman Lidar data using Damao Zhang algorithm                                                                     | <a href="https://doi.org/10.5439/2282350">https://doi.org/10.5439/2282350</a> |
| rlprof-fex (Cromwell et al., 2023)  | Raman Lidar: Aerosol backscatter, scattering ratio, lidar ratio, extinction, cloud mask, and linear depolarization ratio derived from Thorson FEX code | <a href="https://doi.org/10.5439/1373934">https://doi.org/10.5439/1373934</a> |
| rnccn (Sivaraman et al., 2023)      | Retrieved Number concentration of CCN profile from Kulkarni 1st algorithm                                                                              | <a href="https://doi.org/10.5439/1813858">https://doi.org/10.5439/1813858</a> |

*ground based*

*Say what is on Arctic Shark*

## 2.2 Offline chemical analysis

The primary advantage of offline chemical analysis is the ability to employ sophisticated laboratory-based analytical techniques impractical for airborne deployment due to payload weight and capacity constraints. The filter samples collected by ArcticShark leverage the advanced chemical analysis capabilities of facilities such as the Environmental Molecular Sciences Laboratory (EMSL), another DOE user facility operated by the Pacific Northwest National Laboratory.

The advanced chemical analysis allows for more comprehensive and detailed analysis of chemical composition to provide deeper insights into the chemical properties of atmospheric particles, including the use of highly sophisticated analytical instruments like a Micro-Nebulization Aerosol Mass Spectrometer (MN-AMS), Computer Controlled Scanning Electron Microscopy with Energy Dispersive X-ray Spectroscopy (CCSEM-EDX), Orbitrap high-resolution mass spectrometry (HRMS), and Time-of-Flight Secondary Ion Mass Spectrometer (TOF-SIMS). The MN-AMS enables highly sensitive quantification of aerosol composition from the UAS-collected filter samples, with detection limits down to nanogram



120 levels for species like sulfate, nitrate, and organics (Niedek et al., 2022). Combining the MN-AMS technique with other offline methods like TOF-SIMS provides comprehensive insights into organic aerosol composition, oxidation state, mixing state with inorganics, and source differentiation (e.g., biomass burning vs. biogenic).

125 Integrating the STAC (Size and Time resolved Aerosol Collector) impactor (Cheng et al., 2022) with the ArcticShark sampler, aerosol samples can also be collected on TEM grids and Silicon nitride (SiN<sub>x</sub>) substrates. These substrates can be further analyzed using CCSEM-EDX to determine individual particle characteristics, such as size, morphology, mixing state, water uptake potential and elemental composition. (Cheng et al., 2023) This method offers valuable information about various atmospheric particle types and their potential sources. (Lata et al., 2023) Alternatively, these substrates can be directly analyzed with HRMS coupled with a nanospray desorption electrospray Ionization (nano-DESI) source to elucidate intact organic molecular formulas. Researchers can derive key parameters from the mass spectrometer data, including O:C ratios, carbon oxidation states, aromaticity indices, and organic aerosol volatility distributions. (Roach et al., 2010; Vandergrift et al., 2024; Vandergrift et al., 2022).

*"... can be analyzed ..." → were they? what tests were done on these measurements presented here?*

### 2.3 ARM value-added products

To facilitate the use of ARM data more effectively, ARM has developed higher-order data products known as Value-added products (VAPs) (<https://www.arm.gov/capabilities/science-data-products/vaps>). These VAPs are generated by applying advanced, well-developed retrieval algorithms or implementing additional quality control to existing ARM datastreams, enhancing the user's scientific research and model development. Over a hundred baseline VAPs currently cover a wide range of atmospheric parameters, including aerosol and cloud macro- and microphysical properties, chemical properties, precipitating retrievals, atmospheric environment and radiation budget, and various modeling VAPs.

*please say what these mean*

140 In this study, we utilized the CLDTYPE (Flynn et al., 2017) (<https://www.arm.gov/capabilities/science-data-products/vaps/cldtype>) and the MPLCMASKML (Flynn et al., 2023) (<https://www.arm.gov/capabilities/science-data-products/vaps/mplcmaskml>) VAPs for tracking clouds and determining cloud boundaries. For boundary layer height estimations, we overlaid our flight tracks with the CEILPBLHT (Sivaraman et al., 2013) (<https://www.arm.gov/capabilities/instruments/ceil>) and PBLHTRL1ZHANG (Zhang et al., 2022) (<https://www.arm.gov/capabilities/science-data-products/vaps/pblht>) VAPs. Additionally, the Raman Lidar RLPROF-FEX (Chand et al., 2022) (<https://www.arm.gov/capabilities/science-data-products/vaps/rlprof-fex>) VAP was used to obtain aerosol particulate backscatter coefficients and aerosol extinction coefficients.

145 The ARMTRAJ-AAF VAP, offering a Lagrangian back-trajectory dataset was also used in this study. This dataset provided detailed information about the coordinates and thermodynamic properties of airmasses prior to their transport to the UAS sampling region. Trajectories are calculated using the Hybrid Single-Particle Lagrangian Integrated Trajectory (HYSPLIT) model informed by the European Centre for Medium-Range Weather Forecasts ERA5 reanalysis dataset at its highest spatial resolution (0.25 degrees), and are initialized using ArcticShark sampling times and coordinates (latitude,

longitude, and altitude range). Similar to other ARMTRAJ datasets, the ARMTRAJ-AAF provides ensemble run statistics, which are used here as they enhance the trajectory robustness. (Silber et al., 2024).

The Retrieved Number Concentration of CCN VAP (RNCCN, <https://www.arm.gov/capabilities/science-data-products/vaps/rnccn>) provides hourly vertical profiles of CCN concentration at various supersaturation values (Kulkarni et al., 2023b). The VAP algorithm is based on the Ghan and Collins (~~Ghan and Collins~~, 2004) and Ghan et al. (~~Ghan et al.~~, 2006) methods that scale the surface CCN concentration with the dry extinction profiles. The dry extinction profiles are calculated after removing the influence of humidification from the extinction profiles, and to retrieve the vertical CCN concentration, the VAP assumes that aerosol composition is uniform vertically and larger aerosol (> 100 nm) induces ~~X~~ droplet activation first. *yes, good*

### 3 Results

#### 160 3.1 Overview of the airborne observations

##### 3.1.1 Flight tracks

The AAF deployments at the SGP site consisted of a series of flights designed to gather data on the optimal operational parameters under various atmospheric conditions. The diverse flight tracks ensured comprehensive scientific data collection across different geographical areas and weather systems. Figure 1 illustrates the flight tracks from 2021 to 2023, highlighting an extension of the sampling areas in August 2023. This August expansion (flight track in white color) is notably larger compared to the flights conducted before August (represented in light blue), which relied on ground-based visual observers (VO). This improvement in flight range is attributed to operational advancements enabled by having a VO aboard the chase plane. Previously, the UAS was restricted to the red Certificate of Authorization (COA) area with the ground VO. With permission to reach into the yellow COA area, ArcticShark operated in a larger area and reached high altitudes in the dark blue area where the UAS can reach up to 5,500 meters. It allows the UAS to gather data from higher altitudes, which can be crucial for studying the planetary boundary layer and the lower troposphere. It also indicated a robust performance of the UAS in terms of altitude range, as shown in Figure 2.

*How many flights in total?  
A table overview would be nice.*

*say more about the chase plane*

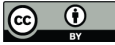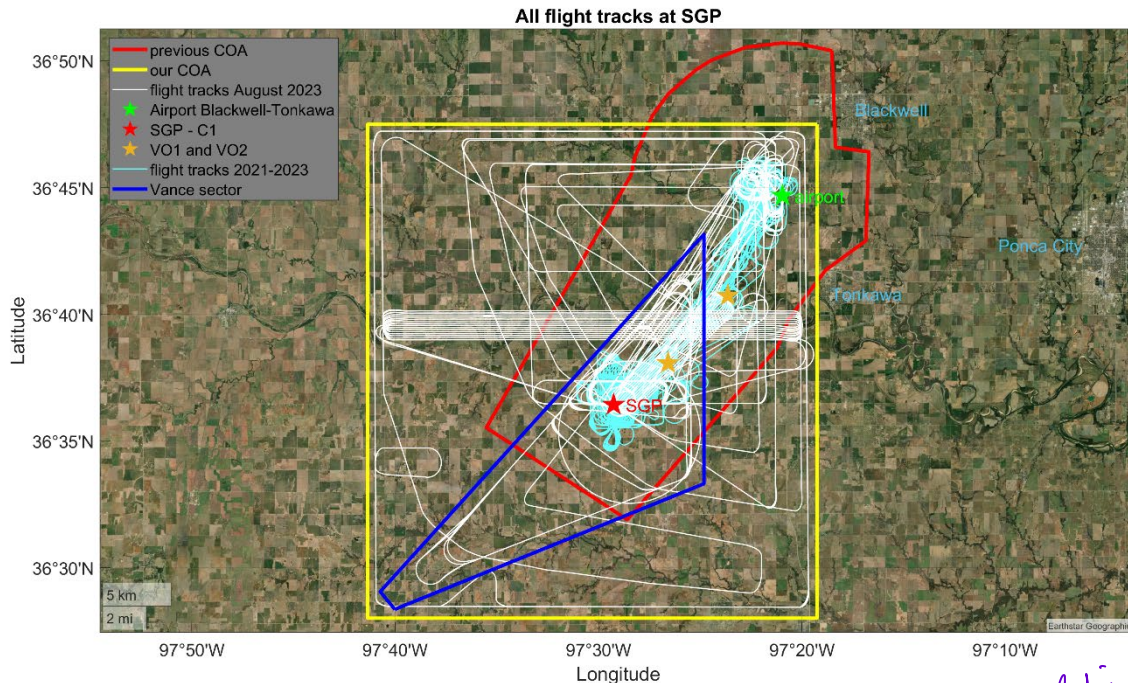

175 **Figure 1.** All ArcticShark flight tracks above the SGP central facility between 2021 and 2023. The COA area expanded from the red box in 2021 to the yellow box in 2023. Due to airspace restrictions, flights above 6000 ft (1828.8 m) are permitted only inside the blue triangle. The white flight tracks show the UAS flight range in August 2023 with the chase plane. The light blue flight tracks show the sampling range between 2021 and 2023 with the visual observers on the ground (green, orange, and red asterisks). *define in caption*

### 3.1.2 Measurements in March, June, and August 2023

180 The March, June, and August 2023 flights provided vertical meteorological information from the airborne measurements, as shown in Figure 2 and Figures S1, S2, and S3. In Figure 2, the data was averaged within altitude intervals of 100 meters for March and June flights and 500 meters for August flights. As shown in Fig 2 (a), the ambient temperature decreases as expected with the increase in altitude. The average temperature in March was around 5 degrees Celsius, typical for the tail end of winter and the beginning of spring. By June, the average temperature had increased significantly, reflecting the onset of summer. By August, the average temperature reached nearly 30 degrees Celsius at the lowest flight level, indicating the peak of the summer season. The relative humidity (Fig 2 (b)) showed a similar range across all three months up to 2000 m above the ground but showed more variation in March (Figure S1). This could be due to the transition from winter to spring, which could bring a mix of weather conditions and, therefore, a wider range of humidity levels. Above 2000 meters, relative humidity (RH) values in August increased and exhibited considerable variation, probably due to air cooling, proximity to moisture sources, and atmospheric dynamics. With the chase plane, ArcticShark can fly through holes in broken cloud fields

185  
190

*difficult to see here. Add numbers?*

*RH is not in that figure or at all in Supplement*

*can it fly in clouds?*

*how many?*



and reach altitudes above the cloud tops, allowing it to operate in areas with higher moisture content, closer to the air's saturation point.

**Figure 2. Atmospheric conditions encountered during the March, June, and August 2023 flights. (a) ambient temperature; (b) ambient relative humidity; (c) total number concentration from the mixing condensation particle counter (CPC); and (d) total**

195

*for mean ± std?  
for how many flights?*

*specify difference in particle size*

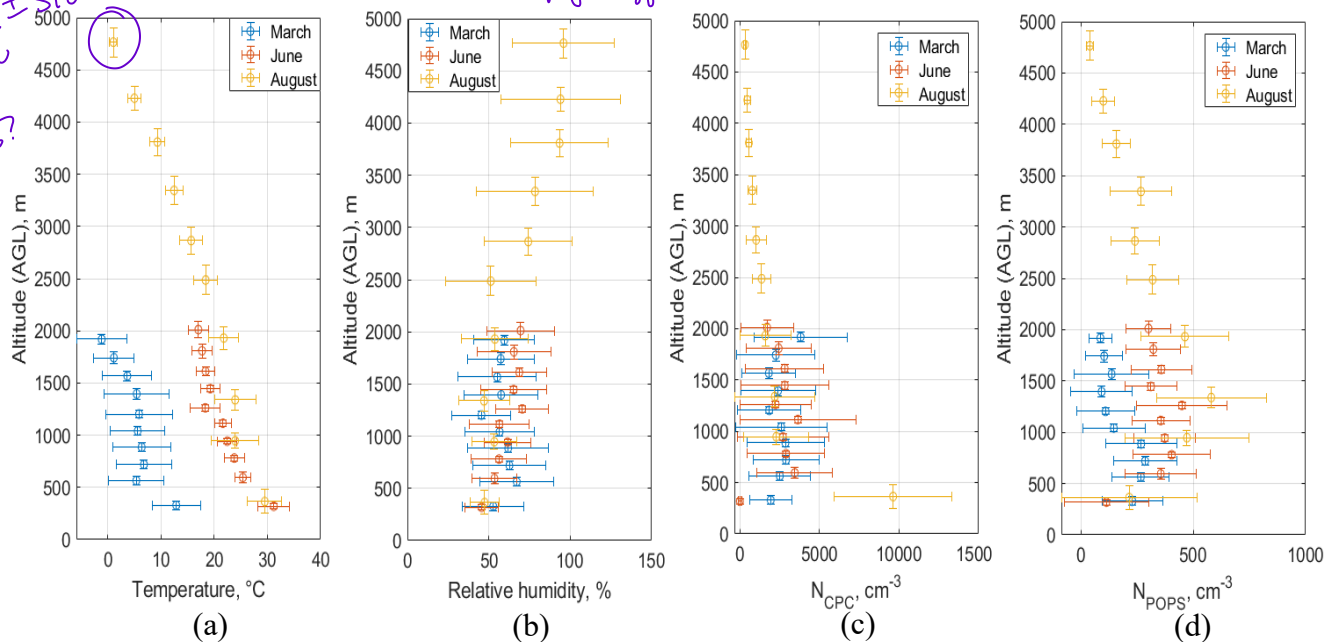

**number concentration from the portable optical particle spectrometer (POPS).**

*3 months similar to each other, but high variation within each*

The total number concentrations of ambient particles remain relatively stable across all three months within the 500 to 2000 m altitude range and decrease with the increase in altitude, as shown in Fig. 2 (c). This consistency suggests that the overall particle load in the atmosphere at these elevations does not vary significantly in those three months. Meanwhile, near the surface, we observed a notable increase in particle concentration close to the ground in August, which might be related to the haze environment prevalent during that month and local agricultural burning events. In contrast, the number concentration of larger particles, specifically those with a diameter greater than 135 nanometers (as shown in Fig. 2(d)), rose steadily from March to August. In March, the concentration of these larger particles was relatively lower, which might indicate a slower growth rate. This slower growth could be linked to the colder temperatures typical of early spring, which may have inhibited atmospheric aerosol particle growth or source activities responsible for forming and accumulating larger particles. As temperatures warmed from March through August, the increase in particle concentration, especially in the accumulation size range, could reflect enhanced atmospheric processes, such as more active secondary particle formation or increased emissions

200

205

*only CPC*  
*only the means.*



210 from local agriculture sources. The warmer temperatures likely facilitated these processes, leading to the observed rise in larger particles as the months progressed.

*New Section*  
215 Figure 3 compares meteorological data collected by the ArcticShark with the data collected by a weather balloon when both were in the air for March, June, and August flights. These two platforms offer different advantages and can provide complementary information about atmospheric conditions. Weather balloons are among the most straightforward and cost-effective tools for atmospheric measurements, with a well-established history of providing consistent long-term data (Vömel and Ingleby, 2023). In contrast, UAS enables more targeted data collection, allowing for the simultaneous operation of multiple sensors to gather diverse datasets during the same airborne mission. In this study, we used orthogonal linear regression to fit a linear model to the data because there are measurement errors in both ArcticShark and weather balloon measurements. Strong agreement was observed between the ArcticShark and weather balloon data for ambient temperature and humidity, with slopes near 1 and high R-squared values indicating strong correlations, as shown in Figures 3(a) and 3(b). ArcticShark was equipped with redundant temperature sensors (AIMMS-30 and a fiber-optic thermal sensor) and humidity sensors (AIMMS-30 and a LiCor H<sub>2</sub>O/CO<sub>2</sub> analyzer), both of which showed strong agreement with the weather balloon measurements.

225 Additionally, the study found a good correlation ( $R^2 > 0.92$ ) for wind speed and direction comparison between ArcticShark and the weather balloon data. These agreements confirm that the ArcticShark's sensors accurately captured the atmospheric conditions at various altitudes, validating its use for meteorological research. While weather balloons remain the standard for high-altitude measurements, UAS are emerging as a valuable complementary tool, offering flexibility, reusability, and high spatial resolution measurements.

*radiosonde? specify what kind + type of data*

*Please discuss why there is so much variation/spread or why it is worse than Temp/RH*

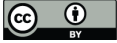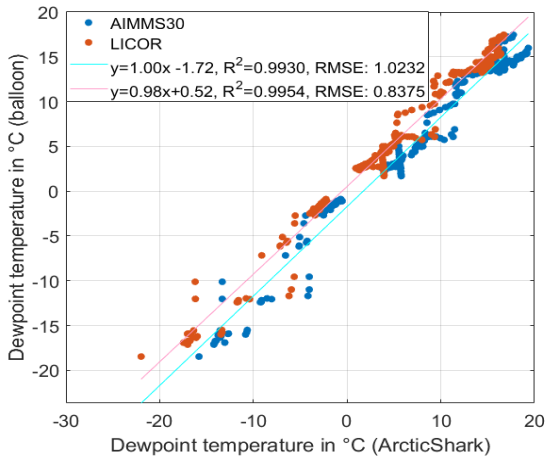

(a)

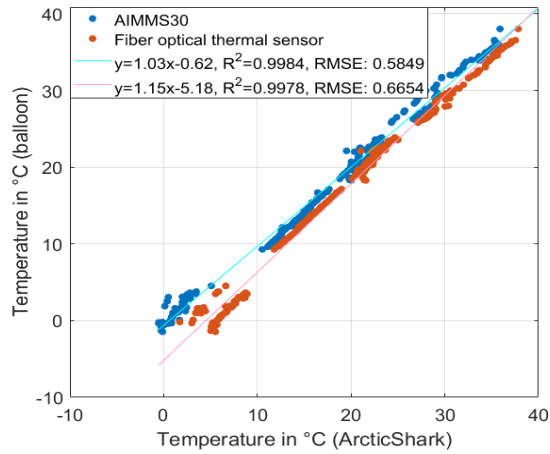

(b)

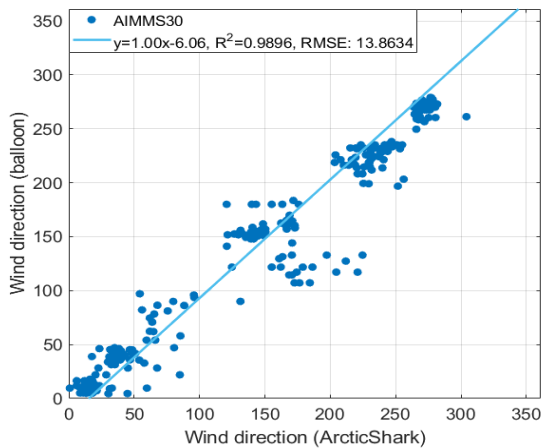

(c)

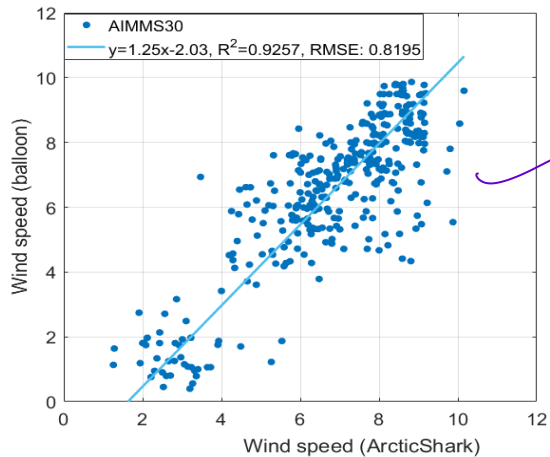

(d)

230 **Figure 3. Meteorological data comparison between the ArcticShark flight (for March, June, and August) and the weather balloon 2023.** (a) Dewpoint temperature comparison between AIMMS-30 and LICOR aboard ArcticShark; (b) Temperature comparison between AIMMS-30 and the Fiber optical thermal sensor aboard ArcticShark; (c) Wind direction comparison; and (d) Wind speed comparison.

Integrating ArcticShark flight data with ARM remote sensing observations (Figures 4 and 5) offers valuable insights into the varying atmospheric conditions encountered across different months, how these conditions influence UAS operations, and the data types collected. Figure 4 overlaid the cloud masks (from MPLCMASKML VAP), flight altitude, and Planetary Boundary Layer (PBL) height from three typical March, June, and August flight days. The height of the PBL varies with the seasons, generally lower in the spring due to less intense solar heating of the Earth's surface and higher in the summer due to increased solar heating. As shown in Figure 4, the PBL height in March and June was generally lower compared to August



240 due to several factors: lower solar radiation and surface heating in early spring, the stabilizing temperature gradient, and  
different atmospheric dynamics. In March and June, increased moisture and still-growing vegetation contribute to lower  
sensible heat flux. Conversely, August typically experiences intense solar heating, stronger convective currents, and drier  
conditions, all leading to a higher PBL.

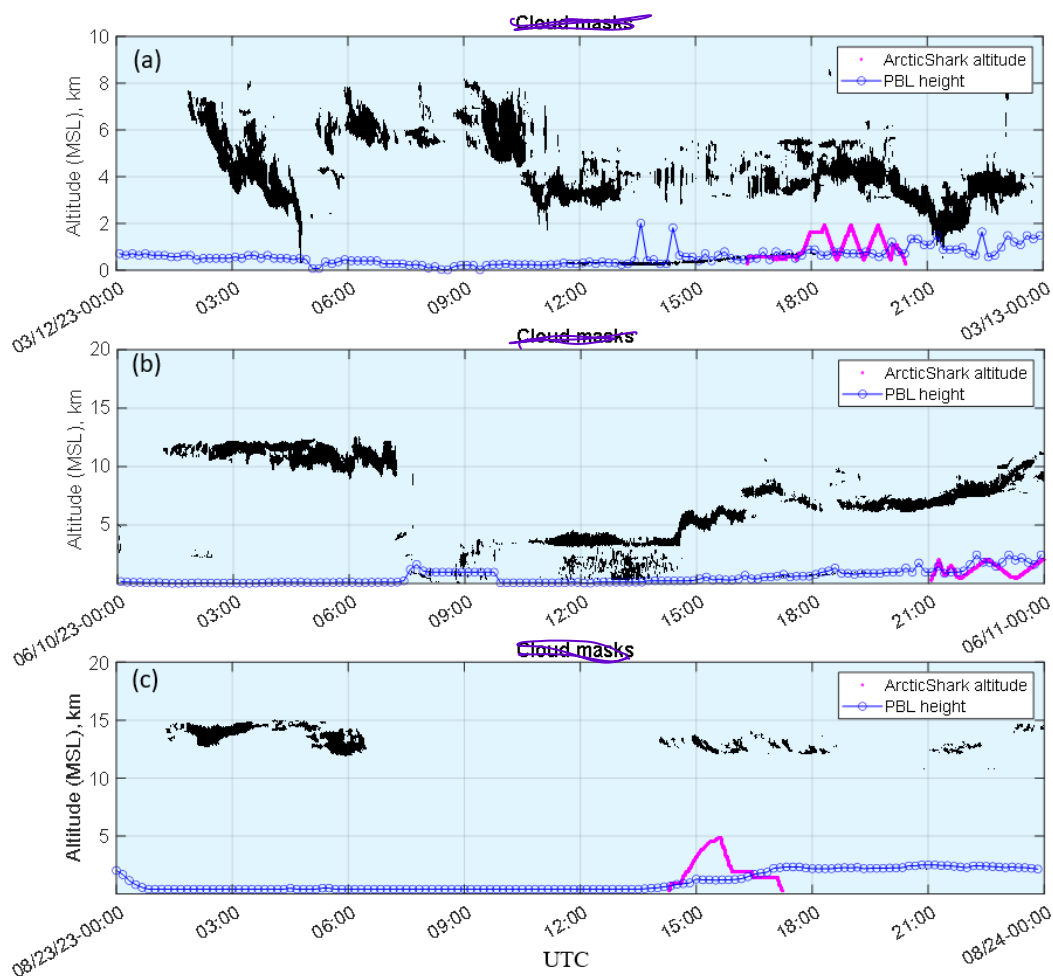

245 **Figure 4. Typical ArcticShark flight altitude overlay with the cloud masks and the planetary boundary layer (PBL) height on (a) March 12, (b) June 10, and (c) August 23. The y-axis is the altitude above the mean sea level (MSL).**

*in 2023.*  
*(PBL)*

250 Additionally, the study found a good correlation ( $R^2 > 0.92$ ) for wind speed and direction comparison between ArcticShark and the weather balloon data. These agreements confirm that the ArcticShark's sensors accurately captured the atmospheric conditions at various altitudes, validating its use for meteorological research. While weather balloons remain the



standard for high-altitude measurements, UAS are emerging as a valuable complementary tool, offering flexibility, reusability, and high spatial resolution measurements.

255 Integrating ArcticShark flight data with ARM remote sensing observations (Figures 4 and 5) offers valuable insights into the varying atmospheric conditions encountered across different months, how these conditions influence UAS operations, and the data types collected. Figure 4 overlaid the cloud masks (from MPLCMASKML VAP), flight altitude, and Planetary Boundary Layer (PBL) height from three typical March, June, and August flight days. The height of the PBL varies with the seasons, generally lower in the spring due to less intense solar heating of the Earth's surface and higher in the summer due to increased solar heating. As shown in Figure 4, the PBL height in March and June was generally lower compared to August due to several factors: lower solar radiation and surface heating in early spring, the stabilizing temperature gradient, and  
260 different atmospheric dynamics. In March and June, increased moisture and still-growing vegetation contribute to lower sensible heat flux. Conversely, August typically experiences intense solar heating, stronger convective currents, and drier conditions, all leading to a higher PBL.

265 Additionally, the figure showed that the clouds on flight days in March were much lower than in June and August, which aligns with the lower PBL height in the spring. In March, cumulus congestus clouds were most common in the region and more common in spring's cooler, more variable weather. Cumulus and convective clouds are observed for flight days in June. These clouds were typically associated with warm weather and were more prevalent as our flights moved into the summer months. By August, cirrus clouds were the dominant cloud type on flight days. These are high-altitude clouds that form above 6,000 meters and are often associated with fair weather, which is favored for the UAS flight operation.

270 The combination of the backscattering coefficient (from RLPROF-FEX VAP), flight altitude, PBL height, and TKE (estimated based on ArcticShark measurement) provides a comprehensive picture of the composition and structure of the atmosphere, as shown in Figure 5. The figure showed that the TKE values were nearly zero when the ArcticShark flew above the PBL. When the ArcticShark was within the PBL, the TKE values significantly increased. As expected, the turbulence intensity should be higher within the PBL because this is where the sun's heating of the Earth's surface generates thermal turbulence. This observation is particularly useful in August when reliable measurements of the PBL height are unavailable.  
275 Vertical gradients in TKE can indirectly indicate the PBL height, as the boundary between the turbulent and non-turbulent regions of the atmosphere corresponds to the top of the PBL. Therefore, by observing where the TKE values increase, we can infer the height of the PBL. *new paragraph* The backscattering coefficients exhibited varying ranges from March to August, with values in March being ten times higher compared to those in August. An aerosol layer was aloft at the beginning of the March flight (Figure 5(a)) above the SGP observatory. However, the aircraft was flown between the SGP site and Blackwell airport and did  
280 not capture more information about that layer. The backscattering plot captured the residue layer in the June flight while the ArcticShark flew into it between 23:00 and 23:30 UTC. *- and what can you conclude?*

*UAS?*  
*UAS aerosol measurements?*

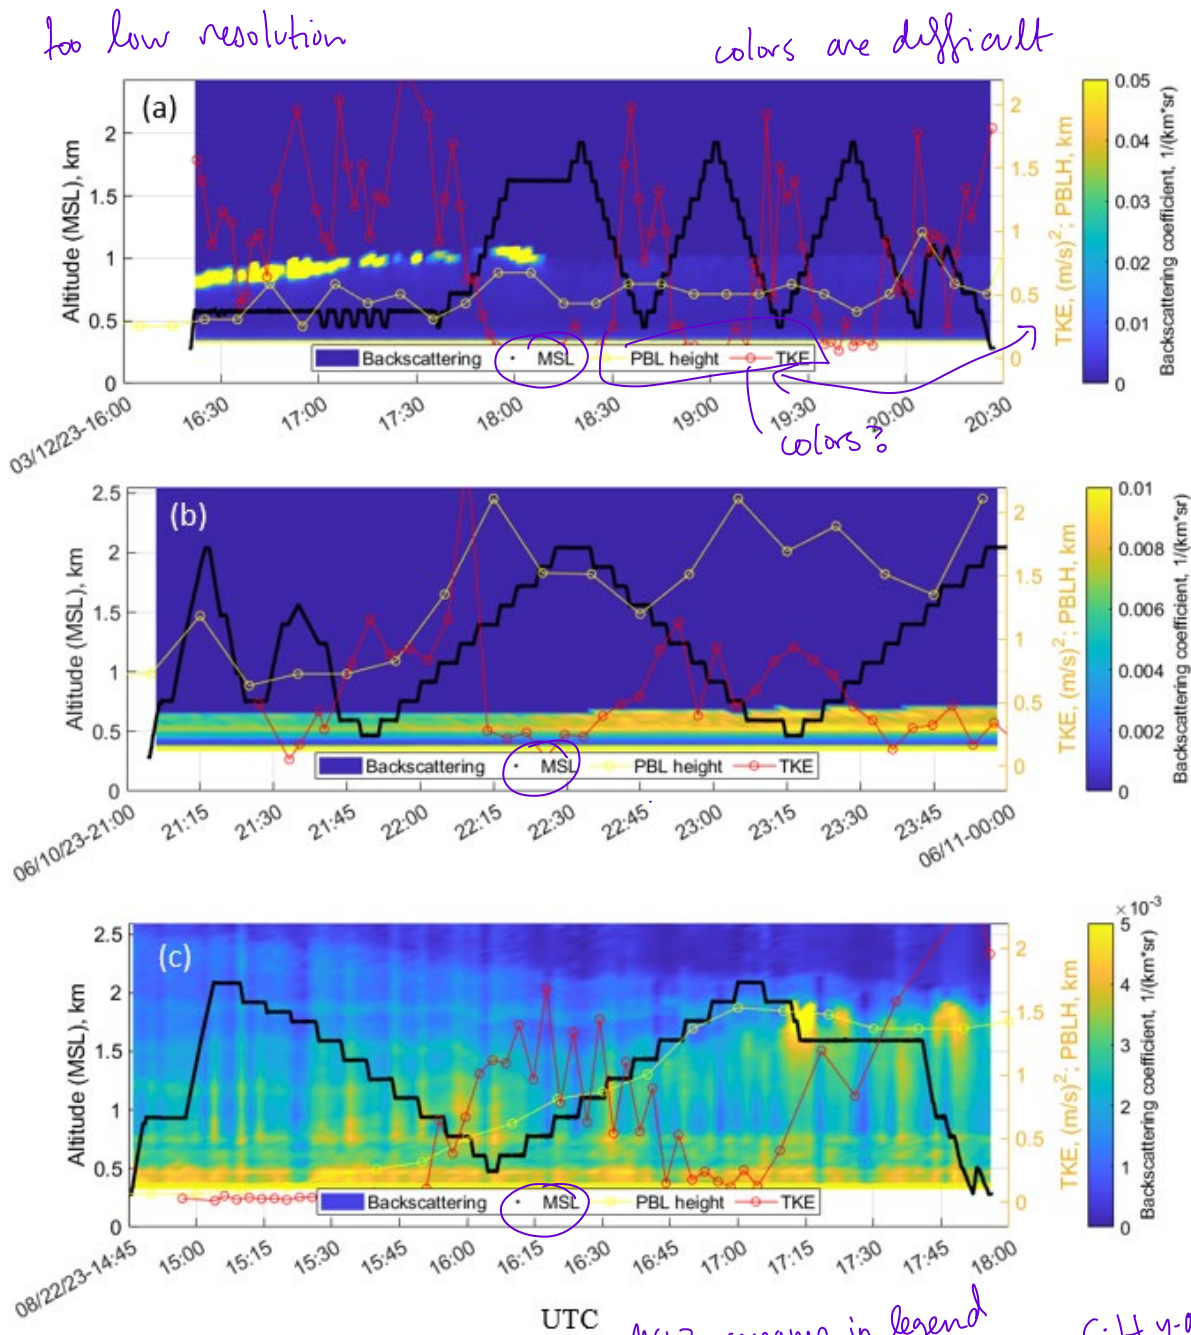

Figure 5. Aerosol backscattering overlaid with the ArcticShark flight altitude, the PBL height, and TKE values on (a) March 12, (b) June 10, and (c) August 22. The y-axis is the altitude above mean sea level (MSL).

*2023*  
*left*



*date, time, alt*

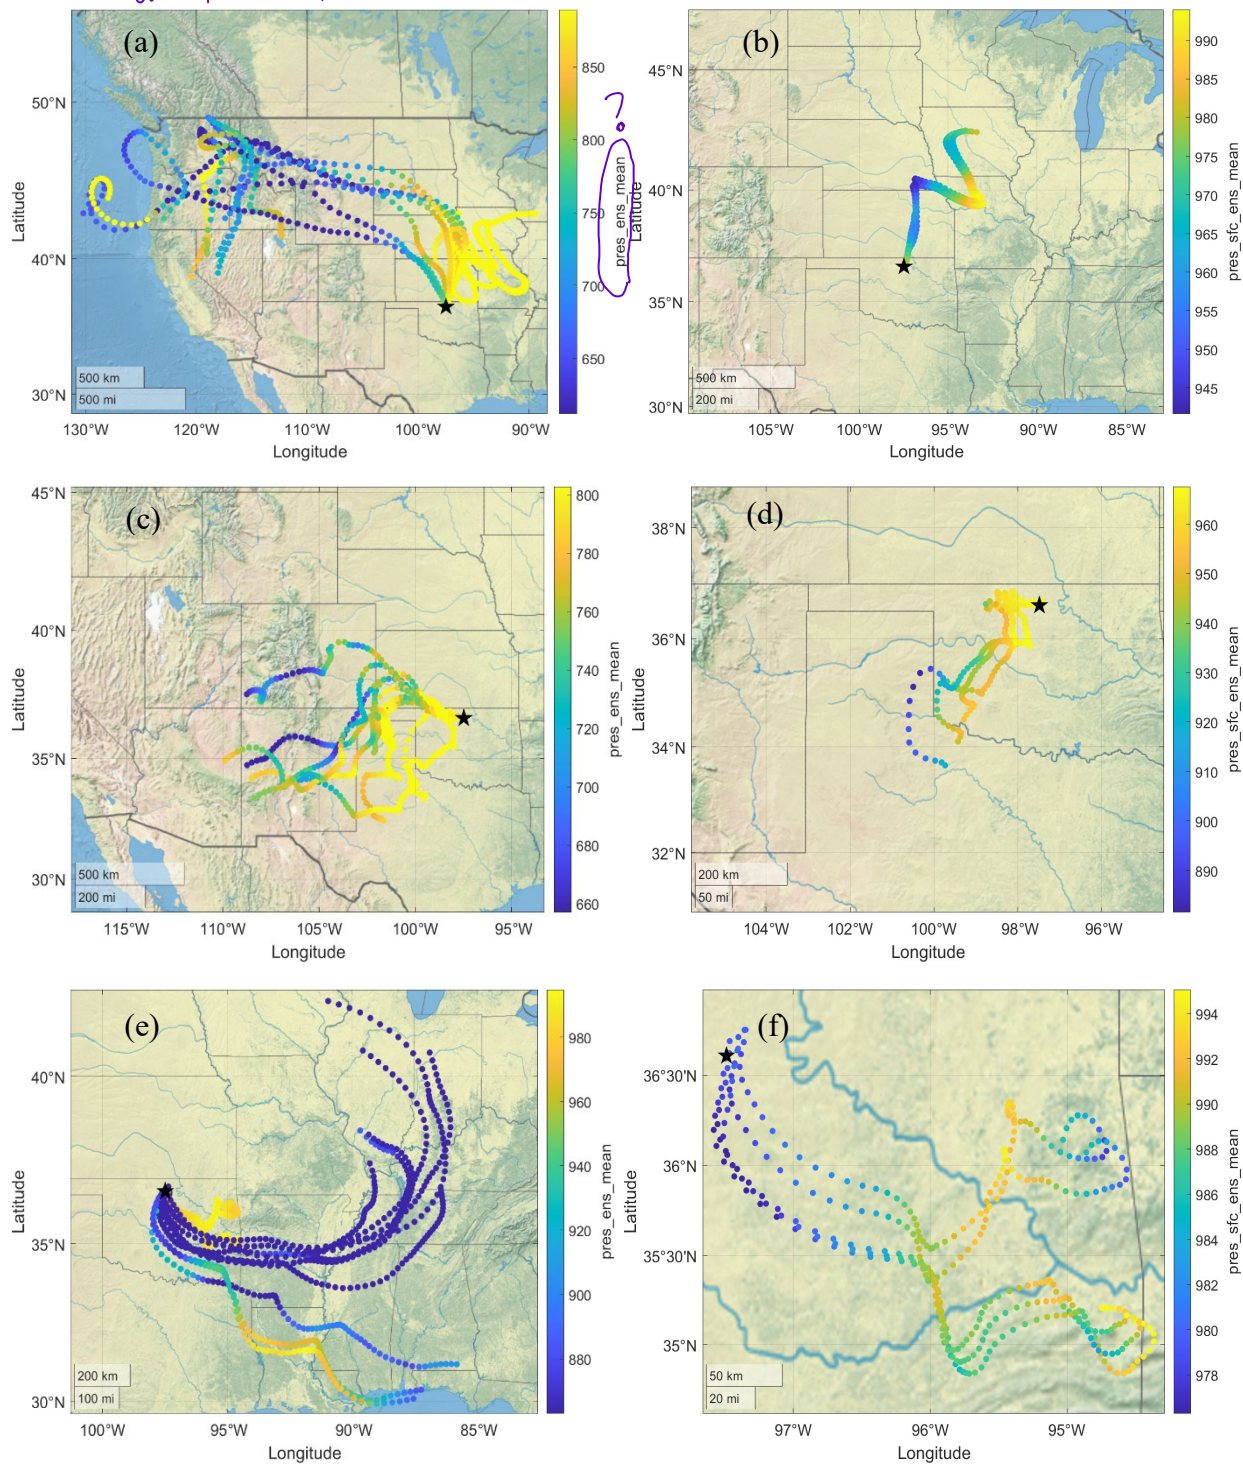



**Figure 6. ARMTRAJ-AAF 5-day back trajectory properties on March 12 (a) and (b), June 10 (c) and (d), and August 23 (e) and (f).** The illustrated ensemble mean trajectories are calculated based on the flight coordinates and altitude range during measurement periods in (a), (c), and (e) and based on the ground level at the ArcticShark's flight coordinates in (b), (d), and (f). The star is the central facility at the SGP site. All figures are generated using Natural Earth by MATLAB®.

290

*New Section*

The back trajectory of airmasses can support aerosol studies by providing context to long-range aerosol transport and suggest potential interactions during their path. Figure 6 presents a comparison of ARMTRAJ 5-day back-trajectory properties on three separate dates: March 12, June 10, and August 23. For each date, two types of trajectories are shown: one set based on flight coordinates and altitude range during measurement periods (Figures 6(a), 6(c), and 6(e)) and another set of trajectories initialized at the ground level at the ArcticShark's flight coordinates (Figures 6(b), 6(d), and 6(f)). The ensemble statistics presented here are based on 25-member ensembles generated for each trajectory initialization altitude over a 5x5 grid typically spanning several kilometers to each direction relative to the ArcticShark's coordinates. The ensemble mean trajectories calculated using the flight altitudes (Figures 6(a), 6(c), and 6(e)) indicate longer travel pathway distances compared to those calculated based on ground-level initialization. The trajectories suggest that the flight period measurements included a wider range of atmospheric conditions and altitudes, capturing more variant and extended air mass pathways compared to ground-level measurements that were more localized. On March 12, The air mass trajectories originated mainly from the north region of the US before reaching the sampling area near the Southern Great Plains (SGP) site. The trajectories showed that the air mass traveled from the southwest on June 12. On August 23, the air mass was more influenced by the southeast region. The differences in air mass origin and trajectory paths between the three dates could be attributed to seasonal atmospheric circulation patterns, which vary with changes in temperature, pressure systems, and overall weather conditions.

295

300

305

**Table 2. Chemical composition of UAS filter samples measured by the MN-AMS analysis**

| Start time       | End time         | Ambient Mass concentration ( $\mu\text{g}/\text{m}^3$ ) | Volume fraction              |                          |          | O/C    | H/C    | Organic density calculated ( $\text{kg}/\text{m}^3$ ) | $\kappa_{\text{Org}}$ | $\kappa_{\text{Overall}}$ |
|------------------|------------------|---------------------------------------------------------|------------------------------|--------------------------|----------|--------|--------|-------------------------------------------------------|-----------------------|---------------------------|
|                  |                  |                                                         | $(\text{NH}_4)_2\text{SO}_4$ | $\text{NH}_4\text{NO}_3$ | Organics |        |        |                                                       |                       |                           |
| 3/9/23<br>21:13  | 3/9/23<br>23:04  | 6.0                                                     | 0.06                         | 0.19                     | 0.75     | 0.3459 | 1.6817 | 1141                                                  | 0.10                  | 0.24                      |
| 3/10/23<br>16:43 | 3/10/23<br>21:15 | 5.3                                                     | 0.10                         | 0.32                     | 0.58     | 0.4758 | 1.6038 | 1249                                                  | 0.20                  | 0.39                      |
| 3/12/23<br>16:20 | 3/12/23<br>20:27 | 3.2                                                     | 0.06                         | 0.26                     | 0.68     | 0.3358 | 1.6897 | 1132                                                  | 0.09                  | 0.27                      |
| 3/13/23<br>15:26 | 3/13/23<br>18:01 | 3.5                                                     | 0.07                         | 0.13                     | 0.80     | 0.3061 | 1.7107 | 1106                                                  | 0.06                  | 0.18                      |



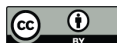

|                  |                  |     |      |      |      |        |        |      |      |      |
|------------------|------------------|-----|------|------|------|--------|--------|------|------|------|
| 3/14/23<br>17:25 | 3/14/23<br>21:28 | 3.2 | 0.08 | 0.19 | 0.74 | 0.3555 | 1.6626 | 1153 | 0.11 | 0.25 |
| 3/17/23<br>21:30 | 3/17/23<br>23:39 | 4.3 | 0.08 | 0.03 | 0.89 | 0.3074 | 1.7134 | 1106 | 0.07 | 0.13 |
| 6/8/23<br>16:28  | 6/8/23<br>19:07  | 5.2 | 0.10 | 0.02 | 0.88 | 0.4669 | 1.6102 | 1241 | 0.20 | 0.25 |
| 6/9/23<br>13:49  | 6/9/23<br>17:40  | 5.9 | 0.08 | 0.03 | 0.90 | 0.4310 | 1.6497 | 1206 | 0.17 | 0.22 |
| 6/10/23<br>21:00 | 6/11/23<br>1:06  | 27  | 0.05 | 0.01 | 0.93 | 0.5367 | 1.6438 | 1274 | 0.26 | 0.28 |
| 6/12/23<br>17:45 | 6/12/23<br>19:42 | 6.9 | 0.05 | 0.02 | 0.93 | 0.4019 | 1.6849 | 1177 | 0.14 | 0.18 |
| 6/22/23<br>14:13 | 6/22/23<br>16:58 | 8.5 | 0.07 | 0.02 | 0.91 | 0.4624 | 1.6463 | 1227 | 0.19 | 0.23 |
| 6/23/23<br>14:32 | 6/23/23<br>16:13 | 8.7 | 0.09 | 0.03 | 0.89 | 0.4279 | 1.6697 | 1198 | 0.17 | 0.22 |
| 8/17/23<br>14:58 | 8/17/23<br>17:40 | 8.8 | 0.20 | 0.07 | 0.73 | 0.3316 | 1.8754 | 1080 | 0.09 | 0.23 |
| 8/18/23<br>14:04 | 8/18/23<br>17:44 | 7.6 | 0.10 | 0.04 | 0.87 | 0.3330 | 1.8764 | 1081 | 0.09 | 0.16 |
| 8/21/23<br>14:45 | 8/21/23<br>17:08 | 14  | 0.12 | 0.04 | 0.84 | 0.2991 | 1.9034 | 1052 | 0.06 | 0.15 |
| 8/22/23<br>14:45 | 8/22/23<br>17:56 | 8.9 | 0.09 | 0.03 | 0.87 | 0.3217 | 1.8876 | 1071 | 0.08 | 0.15 |
| 8/23/23<br>14:14 | 8/23/23<br>17:39 | 14  | 0.07 | 0.03 | 0.90 | 0.3109 | 1.9047 | 1060 | 0.07 | 0.12 |
| 8/24/23<br>13:40 | 8/24/23<br>17:43 | 7.5 | 0.09 | 0.03 | 0.88 | 0.3064 | 1.9069 | 1056 | 0.06 | 0.13 |
| 8/26/23<br>13:51 | 8/26/23<br>19:38 | 10  | 0.08 | 0.03 | 0.89 | 0.2910 | 1.9073 | 1046 | 0.05 | 0.11 |
| 8/27/23<br>13:58 | 8/27/23<br>17:14 | 8.8 | 0.12 | 0.04 | 0.83 | 0.3100 | 1.8935 | 1062 | 0.07 | 0.16 |

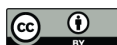

|                  |                  |    |      |      |      |        |        |      |      |      |
|------------------|------------------|----|------|------|------|--------|--------|------|------|------|
| 8/29/23<br>15:18 | 8/29/23<br>19:49 | 39 | 0.13 | 0.05 | 0.82 | 0.4321 | 1.8664 | 1146 | 0.17 | 0.25 |
| 8/30/23<br>15:17 | 8/30/23<br>20:32 | 28 | 0.29 | 0.11 | 0.60 | 0.4766 | 1.7565 | 1204 | 0.21 | 0.37 |

### 3.2 Case study with unique measurement capabilities *so not all flights had chem. analysis?*

#### 310 3.2.1 **Advanced offline chemical analysis**

Based on the chemical analysis results of the MN-AMS, we summarized the chemical compositions derived from the flights in Table 2, which displayed a clear seasonal trend in the chemical composition data from the ARM SGP site. The total mass loading increased from March to August, consistent with the trend in aerosol total number concentrations. In March, the average total mass concentration of organic species and ammonium salts was  $4.2 \mu\text{g}/\text{m}^3$ , doubling to  $10.4 \mu\text{g}/\text{m}^3$  in June and  
315 escalating to  $14.7 \mu\text{g}/\text{m}^3$  in August. This pattern is consistent with seasonal differences observed in previous studies (Fast et al., 2022; Liu et al., 2021; Parworth et al., 2015). Interestingly, the organic volume fraction in the samples from March was lower (typically less than 80%) than those from June. The June samples exhibited a higher oxygen-to-carbon (O:C) ratio, *indicating* *signifying* that the organic aerosols were more oxidized. This trend can be attributed to the increased atmospheric oxidative reactions during warmer weather. The presence of more organic aerosols in the atmosphere in June and August could also  
320 result from increased biological activity during the summer months. This diverse chemical composition explains the increased variability (O:C ratios and organic volumetric fractions) observed in the August samples.

The integration of samples collected from the ArcticShark with advanced offline high-resolution analytical techniques is shown in Figure 7 for the flight on June 19, 2023 (continuous collection from 600 – 2000 m above sea level). For this representative sample, analysis via the nano-DESI HRMS pipeline resulted in 767 individual molecular formulas (MF)   
325 assignments, including a high proportion of organosulfates (99 MF containing C, H, O, and S atoms) and organonitrates (230 MF containing C, H, N, and O atoms; mass spectrum shown in Figure 7(a)). The assigned MF are then parametrized according to the strategy from Li et al. (Li et al., 2016), resulting in a volatility distribution (individual MFs are classified as volatile organic carbon (VOC), intermediate VOC (IVOC), semi-VOC (SVOC), low VOC (LVOC), or extremely low VOC (ELVOC); Figure 7(b)). For the same sample, Figure 7 (c) shows an exemplary top-view scanning electron microscopy (SEM) image,   
330 showing the dominance of organic particles and the potential for  $\text{K}_2\text{SO}_4$  inclusion within the organic particles. Figure 7 (d) depicts the size-resolved chemical composition (acquired via CCSEM/EDX indicating dominance of carbonaceous (CNO, 38.4%) and carbonaceous sulfate (CNOS, 61.1%) aerosol with minor fraction of  $\text{K}_2\text{SO}_4$  (0.4%) containing aerosol. The particle classification scheme was illustrated in Figure S4. More studies on the chemical characterization of the 2023 flight samples or size-resolved compositions *are* *were* under preparation. (Niedek; Mansoura) ?

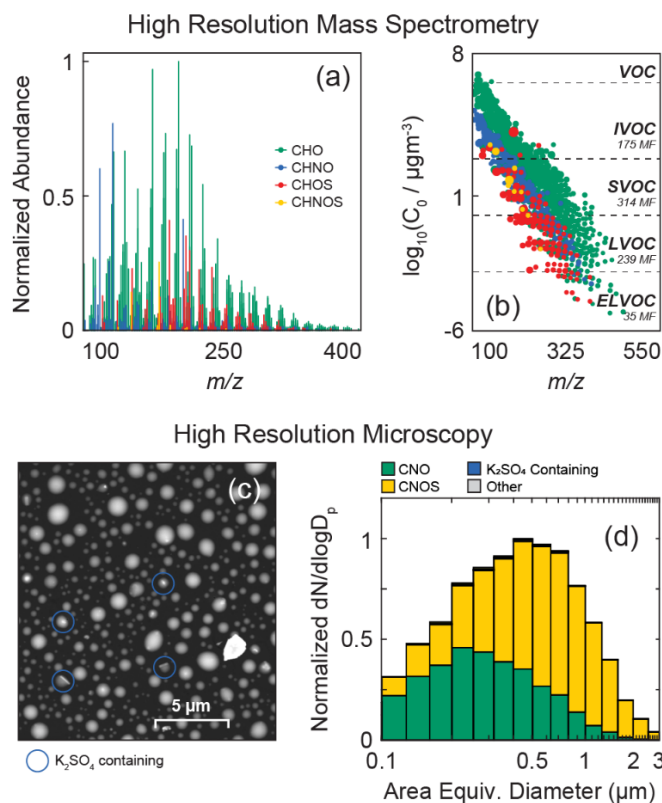

335

**Figure 7. Offline high-resolution analyses of the molecular composition of organic aerosols and size-resolved chemical composition for a representative sample from the June 19, 2023 flight (continuous sample collection over 600 – 2000 m MSL) (a) mass spectrum from direct nano-DESI HRMS analysis; (b) volatility distribution from parametrized mass spectrum data; (c) size-resolved chemical composition from CCSEM/EDX; (d) top-view SEM image, highlighting instances of inorganic inclusion.**

### 340 3.2.2 Vertical profile of aerosol optical properties

With an overview of the atmospheric parameters, the following sections explore two case studies that further illuminate our UAS capabilities – providing detailed vertical information on aerosol optical properties and aerosol’s potential to form clouds (Cloud Condensation Nuclei (CCN) concentrations), which enable a more accurate and comprehensive assessment of aerosol impacts on the Earth’s radiation budget.

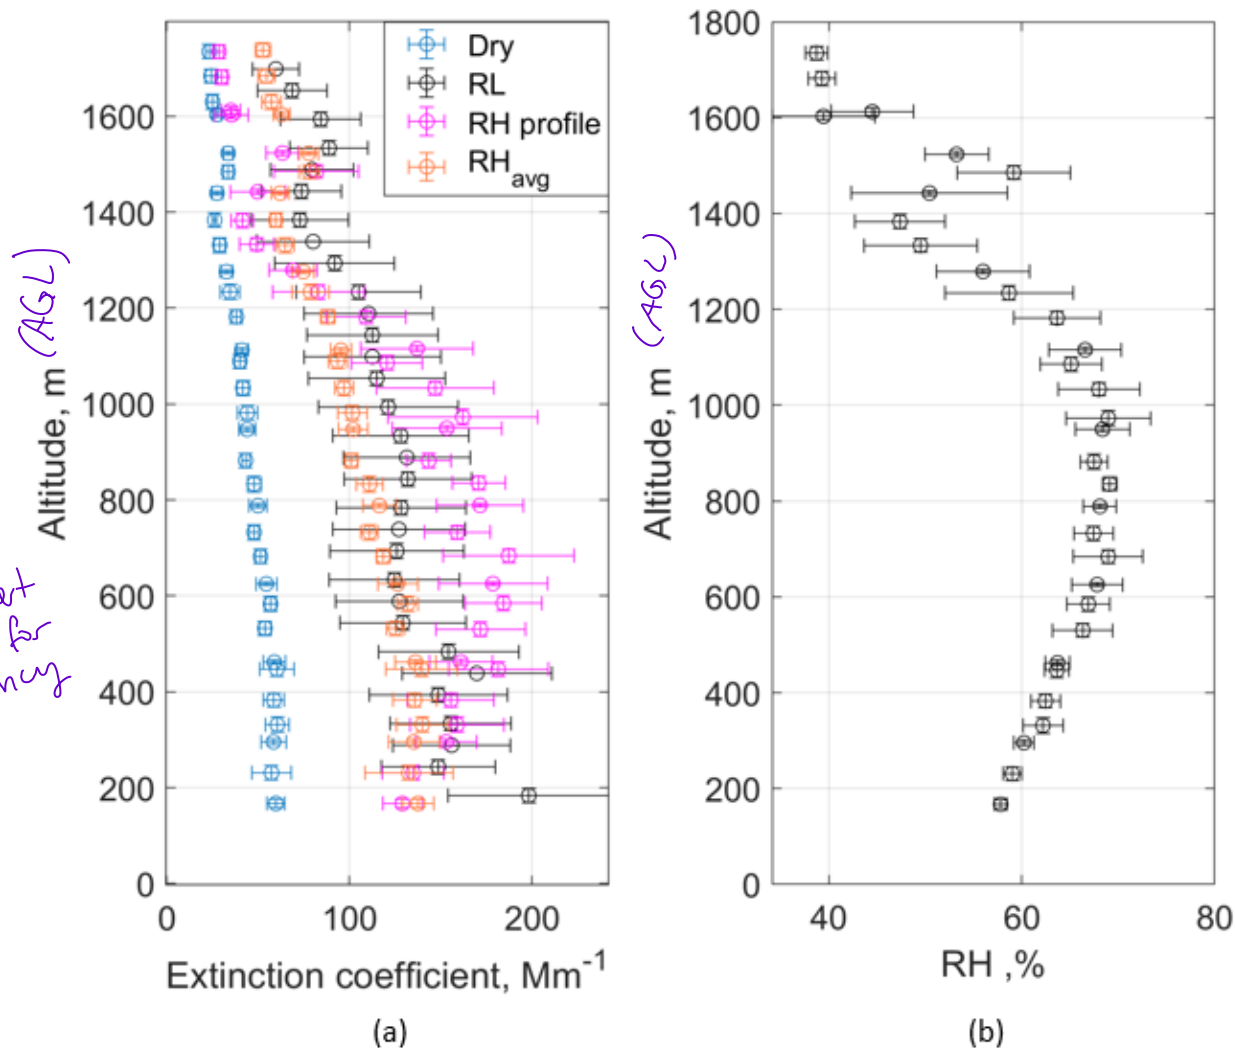

345

**Figure 8. Aerosol extinction coefficient comparison with the Raman Lidar (RL) retrieval on Aug. 22, 2023. Note that the altitude is above ground level. The estimated aerosol extinction coefficients (a) were under three conditions: the sampling dry condition, corrected with the averaged ambient RH condition, and corrected with the ambient RH profile condition (b).**

Aerosol optical properties depend on relative humidity, aerosol size distributions (usually measured at RHs lower than ambient RH), and the complex refractive index, which should be adjusted accordingly (Ghan and Schwartz, 2007; McComiskey and Ferrare, 2016). In this section, we discuss our approaches to estimating aerosol optical profiles under ambient conditions, which involve accounting for various factors (e.g., ambient temperature, pressure, and RH) that influence how aerosol interacts with light. The aerosol profiles of the extinction coefficients are shown in Figure 8(a). The ambient RH profile is shown in Figure 8(b). All the extinction coefficient values were derived under the ambient temperature and pressure. That allows us to focus on the ambient RH effect on this aerosol optical property. Changes in RH can significantly alter aerosol

355



size, chemical composition, and refractive index. In this study, we assume that the RH effect on the refractive index and composition is negligible and only consider the effect on the size distribution.

During the airborne sampling, aerosol particles were dried lower than 40% in the inlet manifold. Using the size distribution directly from the portable optical particle spectrometer (POPS), we can derive the dry aerosol extinction coefficient, as shown in Figure 8(a) (blue symbol). The result is consistent with the previous study under low RH (<40%) – the aerosol extinction decreased with altitude increase (Andrews et al., 2011; Andrews et al., 2004). Then, two approaches were used to study the influence of the RH on the estimated aerosol optical profiles. The first one used the averaged RH value of the profile (based on the right panel of Figure 8(a)), and the growth factor (GF) was calculated as a function of this averaged RH ( $RH_{avg}$ ) value and hygroscopicity (equation 11 in Petters and Kreidenweis's paper, 2008, and Kappa from Table 2), which used the chemical analysis results from the MN-AMS. Then, we assumed that the same GF would weigh the whole size distribution and used the weighted size distribution to estimate the extinction under the ambient RH condition (light brown symbol). The second approach used the  $f(RH)$  profile correction (RH profile with magenta symbol). This correction was performed by applying the  $f(RH)$  parameterization (Zieger et al., 2011) to the estimated aerosol extinction profile based on the POPS size distribution (Mei et al., 2024). The fitted gamma parameter ( $\gamma = 1.53$ , as shown in Figure S5) in this parameterization was obtained from the bulk dataset of all collocated extinction and RH profiles in time with the aircraft sampling periods during the June deployment. The black symbol depicts the retrieved values from Raman Lidar (RLPROF-FEX) at 355 nm wavelength. The comparison showed a good agreement between the aerosol extinction profiles corrected for relative humidity (RH) and the extinction profiles retrieved from lidar in Figure 8. This agreement emphasizes the significant impact of ambient RH on the aerosol extinction coefficients.

This study highlights several promising avenues for future research. Firstly, leveraging UAS to estimate aerosol optical profiles and validate lidar retrievals presents a valuable opportunity. UAS can provide high-resolution vertical profiles and targeted measurements in specific areas of interest, complementing the broader spatial coverage of lidar systems. Additionally, integrating high-resolution sensors for relative humidity (RH) and temperature on UAS platforms represents a significant advancement in vertical atmospheric profiling. Furthermore, combining UAS-borne measurements with lidar retrievals can greatly enhance aerosol research. While lidar systems offer continuous data, UAS provides detailed snapshots at various altitudes, contributing to improved temporal resolution. This synergistic approach not only refines the accuracy of aerosol optical profiles but also introduces a versatile and comprehensive methodology for atmospheric studies.

### 3.2.3 Vertical profile of CCN concentration (CCNc)

Understanding the vertical distribution of CCNc is essential for elucidating how aerosols influence cloud formation and properties throughout the atmospheric column. CCN is pivotal in the nucleation process, affecting both the formation and characteristics of cloud droplets. Specifically, higher CCN concentrations result in numerous smaller droplets, whereas lower concentrations lead to fewer, larger droplets. These variations in droplet size significantly impact cloud albedo, cloud lifetime, and precipitation processes (Li et al., 2022; Seinfeld et al., 2016; Rosenfeld et al., 2014). Detailed CCNc profiles, particularly

at the cloud base where air is predominantly entrained into the cloud, are crucial for accurately assessing aerosol-cloud  
interactions (ACI) (Bellouin et al., 2020). We can evaluate and refine model predictions by examining these profiles, especially  
at the cloud base. Discrepancies between observed and predicted CCN concentrations can reveal areas where models may need  
adjustments and lead to ultimately improving the accuracy of CCN predictions and their integration into climate models.

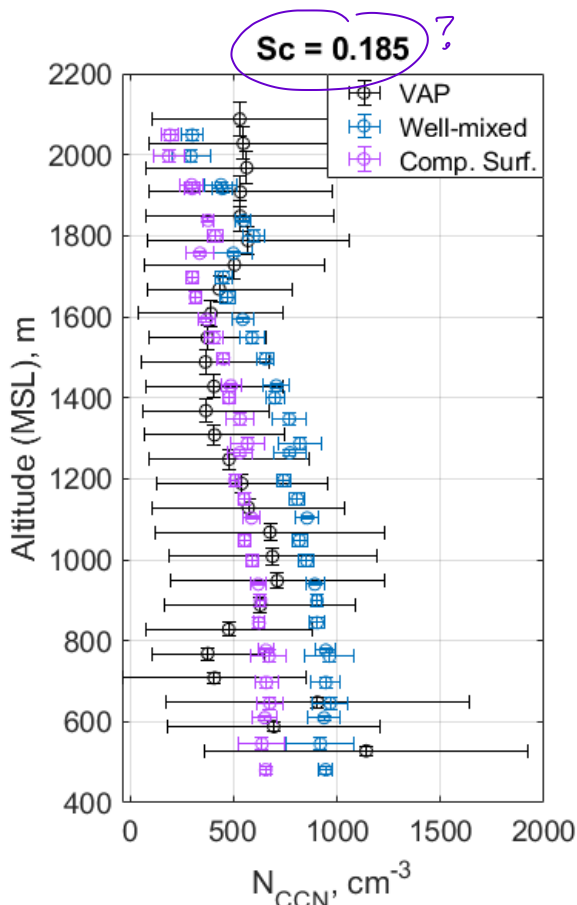

**Figure 9. Cloud condensation nuclei (CCN) concentration ( $N_{CCN}$ ) comparison with the CCNc profile from RNCCN VAP on Aug. 22, 2023. The estimated CCN concentrations were under two conditions: 1) chemical species in the CCN population were well-mixed (Well-mixed), and 2) the surface activity can be explained by a compressed-film model (Comp. Suf.).**

This study estimated the CCNc profile based on the in situ aerosol size distribution data from a portable optical particle spectrometer (POPS) and the chemical composition derived from offline MN-AMS analysis. As shown in Figure 9, two approaches were used to derive the CCNc profiles. The first approach assumed that the aerosol particles were well-mixed. This assumption is based on the premise that the aerosol particles are homogeneously distributed within the air mass, and their chemical and physical properties are uniform throughout the measured size range. This approach allows for estimating the CCNc profile using the  $\kappa$ -Kohler theory (Mei et al., 2013; Petters and Kreidenweis, 2007; Thalman et al., 2017; Kulkarni et al., 2023a). The second approach assumes the formation of a compressed film in the growing droplet, leading to surface tension



depression by interfacial organic molecules (Lowe et al., 2019; Ruehl et al., 2016). The second approach considers the potential  
405 influence of organic compounds on CCN activity. Organic molecules in the aerosol particles can migrate to the particle-water  
interface, forming a compressed film that can significantly reduce the droplet's surface tension, thereby enhancing the droplet  
size observed at activation. The well-mixed assumption led to 30-50% more CCN concentration prediction than the  
compressed surface assumptions. While overlaying the ARM RNCCN VAP data with two profiles, we noticed that both are  
within the uncertainty range of the CCNc profiles derived by the ARM RNCCN VAP.

*can you say more about this  
data product?*

410 Current estimates of CCNc profiles are constrained by the size range of the POPS, which only measures particles larger  
than 135 nm in diameter. This limitation restricts the ability to estimate the CCN concentrations at the higher supersaturation  
range (often limited to less than 0.2% for most flight conditions). This narrow supersaturation range can lead to inaccuracies  
in estimating CCN concentrations, particularly for smaller particles that may play a significant role in cloud nucleation. To  
address this limitation and provide more accurate CCN profile estimations, AAF has incorporated a miniaturized scanning  
415 electrical mobility spectrometer (mSEMS) to extend the measurement range to include smaller aerosol particles (approximately  
10 nm). The mSEMS, POPS, and a custom-built water CPC (with particle collection capability for chemical composition  
analysis) form an additional payload package designed to study aerosol size distribution and its applications in atmospheric  
research. Note that the accuracy of estimated CCN profiles is often uncertain due to the reliance on indirect measurements and  
assumptions. To quantify this uncertainty and assess the limitations of current estimation methods, it is also desirable to  
420 compare estimated CCN profiles with direct in situ CCN measurements with a piloted aircraft campaign. A comparison study  
can thoroughly evaluate the estimation accuracy, identify discrepancies between estimated and observed CCN concentrations  
and highlight potential sources of error in the estimation methods.

#### 4 Conclusions

This study summarizes measurements obtained during the ArcticShark deployments to the SGP observatory in March,  
425 June, and August 2023. We provided an overview of the typical atmospheric conditions observed across these seasons,  
including temperature, relative humidity, aerosol particle concentrations, and chemical compositions. The data reveal  
significant seasonal variations: temperature and total mass loading increased from March to August, with a notable rise in  
oxidized and hygroscopic organic aerosols observed in June. Notably, there was strong agreement between temperature and  
humidity recorded by sensors from the weather balloon and ArcticShark, which indicated the high correlations among various  
430 sensors for critical meteorological parameters, including temperature, humidity, wind speed, and wind direction.

Analysis of cloud masks, flight altitudes, and planetary boundary layer (PBL) heights for representative flights from each  
month illustrated that clouds in March were considerably lower in altitude than those in June and August, with distinct cloud  
types observed in each period. In contrast, higher turbulence was observed within the PBL, as indicated by increased turbulent  
kinetic energy (TKE) values in June.

*this is just remote sensing, not VAS data*



435 Understanding these trajectory differences based on ARMTRAJ-AAF helps interpret the aerosol, cloud, and meteorological measurements recorded by ARM facilities. Recognizing the air mass origins provides insight into potential sources of aerosols or precipitation patterns, impacting cloud formation mechanisms and radiative properties.

We analyzed several cases to further demonstrate the ArcticShark's measurement capabilities. On June 19, 2023, advanced offline analyses of field-collected particles using high-resolution microscopy and mass spectrometry provided detailed insights into particle size, morphology, and composition. Based on the August 22, 2023 data, we compared aerosol extinction coefficient profiles obtained from lidar with those estimated from airborne measurements, as shown in Figure 8. The optical comparison indicated good agreement between the lidar-retrieved extinction profiles and those corrected for relative humidity. Similarly, Figure 9 demonstrates that CCNc profiles derived from airborne measurements closely matched the ARM RNCCN VAP data, highlighting the potential of using airborne data to validate the remote sensing retrieval techniques through further in-depth studies.

In summary, the ArcticShark has proven its capability to collect vertically resolved data under the diverse atmospheric conditions at the ARM SGP site. Integrating UAS data with ground-based observations has provided critical datasets to study atmospheric parameters, aerosol concentrations, chemical composition, and turbulence within the boundary layers. Future work will focus on leveraging both ground-based and airborne measurements, as well as remote sensing techniques, to advance atmospheric research.

*not sure how diverse really. just spring + summer and no clouds?*

## Acknowledgments

This research was supported by the ARM user facility, a US DOE Office of Science user facility managed by the Biological and Environmental Research (BER) program. A portion of this research was performed on project awards (10.46936/lser.proj.2020.51377/60000185 and 10.46936/expl.proj.2021.60186/60008210) under the user projects at the Environmental Molecular Sciences Laboratory (EMSL). Battelle operates the Pacific Northwest National Laboratory (PNNL) for the DOE under contract DE-AC05-76RL01830 to support both EMSL and ARM user facilities. JF acknowledges support from ASR under the Integrated Cloud, Land-surface, and Aerosol System Study (ICLASS) Science Focus Area. QZ and CRN also acknowledge DOE funding from DE-SC0022140. CRN also acknowledges the DOE Office of Science Graduate Student Research (SCGSR) award to support his research and collaboration between UC Davis and PNNL. We acknowledge the use of OpenAI's ChatGPT to assist in refining the language used in this document.

## Data Availability:

Data described in this manuscript can be accessed at [https://adc.arm.gov/essd/ACP\\_Mei](https://adc.arm.gov/essd/ACP_Mei) under each data DOI listed in Table 1. Data collected from the various observation platforms in the SGP region are made freely accessible to the scientific community through public repositories (<https://adc.arm.gov/discovery/#/results>), facilitating a wide range of research endeavors.





### Author Contribution:

FM led the formulation of this paper. FM, GK, and GWV provided the figures. QZ, FM, MSP, JMT, FM, MSP, CRN, SG, BS, and HSM participated the field study and collected the data. XM ZC, GWV, NNL, WC, and ZZ analyzed the chemical samples. FM wrote the draft and all coauthors provided editing suggestions to the manuscript.

### 470 Competing Interests.

The authors declare that they have no conflict of interest.

### References

Andrews, E., Sheridan, P. J., Ogren, J. A., and Ferrare, R.: In situ aerosol profiles over the Southern Great Plains cloud and  
475 radiation test bed site: 1. Aerosol optical properties, *Journal of Geophysical Research: Atmospheres*, 109,  
<https://doi.org/10.1029/2003JD004025>, 2004.

Andrews, E., Sheridan, P. J., and Ogren, J. A.: Seasonal differences in the vertical profiles of aerosol optical properties over  
rural Oklahoma, *Atmos. Chem. Phys.*, 11, 10661-10676, [10.5194/acp-11-10661-2011](https://doi.org/10.5194/acp-11-10661-2011), 2011.

Balsamo, G., Agusti-Panareda, A., Albergel, C., Arduini, G., Beljaars, A., Bidlot, J., Blyth, E., Bousserez, N., Boussetta, S.,  
480 Brown, A., Buizza, R., Buontempo, C., Chevallier, F., Choulga, M., Cloke, H., Cronin, M. F., Dahoui, M., De Rosnay, P.,  
Dirmeyer, P. A., Drusch, M., Dutra, E., Ek, M. B., Gentine, P., Hewitt, H., Keeley, S. P. E., Kerr, Y., Kumar, S., Lupu, C.,  
Mahfouf, J.-F., McNorton, J., Mecklenburg, S., Mogensen, K., Muñoz-Sabater, J., Orth, R., Rabier, F., Reichle, R., Ruston,  
B., Pappenberger, F., Sandu, I., Seneviratne, S. I., Tietsche, S., Trigo, I. F., Uijlenhoet, R., Wedi, N., Woolway, R. I., and  
485 Zeng, X.: Satellite and In Situ Observations for Advancing Global Earth Surface Modelling: A Review, *Remote Sens-Basel*,  
10, 2038, 2018.

Bellouin, N., Quaas, J., Gryspeerdt, E., Kinne, S., Stier, P., Watson-Parris, D., Boucher, O., Carslaw, K. S., Christensen, M.,  
Daniau, A.-L., Dufresne, J.-L., Feingold, G., Fiedler, S., Forster, P., Gettelman, A., Haywood, J. M., Lohmann, U., Malavelle,  
F., Mauritsen, T., McCoy, D. T., Myhre, G., Mülmenstädt, J., Neubauer, D., Possner, A., Rugenstein, M., Sato, Y., Schulz,  
M., Schwartz, S. E., Sourdeval, O., Storelvmo, T., Toll, V., Winker, D., and Stevens, B.: Bounding Global Aerosol Radiative  
490 Forcing of Climate Change, *Reviews of Geophysics*, 58, e2019RG000660, <https://doi.org/10.1029/2019RG000660>, 2020.

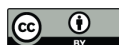

- Berg, L. K., Riihimaki, L. D., Qian, Y., Yan, H., and Huang, M.: The Low-Level Jet over the Southern Great Plains Determined from Observations and Reanalyses and Its Impact on Moisture Transport, *Journal of Climate*, 28, 6682-6706, <https://doi.org/10.1175/JCLI-D-14-00719.1>, 2015.
- 495 Biraud, S. C., Torn, M. S., Smith, J. R., Sweeney, C., Riley, W. J., and Tans, P. P.: A multi-year record of airborne CO<sub>2</sub> observations in the US Southern Great Plains, *Atmos. Meas. Tech.*, 6, 751-763, [10.5194/amt-6-751-2013](https://doi.org/10.5194/amt-6-751-2013), 2013.
- Burk, K., Mei, F., Tomlinson, J., & Mehta, H. Trace gas concentrations - airborne (AAFH2O). Atmospheric Radiation Measurement (ARM) User Facility. <https://doi.org/10.5439/1821160>, 2023a
- 500 Burk, K., Mei, F., Tomlinson, J., & Morris, V. Infrared Thermometer - Airborne (AAFIRT). Atmospheric Radiation Measurement (ARM) User Facility. <https://doi.org/10.5439/1821129>, 2023b
- Burk, K., Mei, F., Stephenson, J., & Pekour, M. Condensation particle counter aboard aircraft (AAFMCPC). Atmospheric Radiation Measurement (ARM) User Facility. <https://doi.org/10.5439/1820906>, 2023c
- Burk, K., Mei, F., & Stephenson, J. ARM Aerial Facility (AAF) - Unmanned Aircraft Systems, Filter Aerosol Sampler (AAFFILTSAMP). Atmospheric Radiation Measurement (ARM) User Facility. <https://doi.org/10.5439/1821176>, 2023d
- 505 Burk, K., Mei, F., Tomlinson, J., & Mehta, H. Meteorological Instrumentation aboard Aircraft (AAFTRH). Atmospheric Radiation Measurement (ARM) User Facility. <https://doi.org/10.5439/1820905>, 2023e
- Chand, D., Newsom, R., Thorsen, T., Cromwell, E., Sivaraman, C., Flynn, C., Shilling, J., and Comstock, J.: Aerosol and Cloud Optical Properties from the ARM Raman Lidars: The Feature Detection and Extinction (RLPROF-FEX) Value-Added Product, ARM user facility, Pacific Northwest National Laboratory, Richland, WA, United States, Medium: ED; Size: 34 p., 510 2022.
- Cheng, Z., Liyu, A., Dexheimer, D., Lata, N. N., Kulkarni, G., Longbottom, C. M., Mei, F., and China, S.: An automated size and time-resolved aerosol collector platform integrated with environmental sensors to study the vertical profile of aerosols, *Environmental Science: Atmospheres*, 2, 1263-1276, 2022.

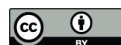

- Cheng, Z., Morgenstern, M., Henning, S., Zhang, B., Roberts, G. C., Fraund, M., Marcus, M. A., Lata, N. N., Fialho, P.,  
515 Mazzoleni, L., Wehner, B., Mazzoleni, C., and China, S.: Cloud condensation nuclei activity of internally mixed particle  
populations at a remote marine free troposphere site in the North Atlantic Ocean, *Sci Total Environ*, 904, 166865,  
<https://doi.org/10.1016/j.scitotenv.2023.166865>, 2023.
- Creamean, J. M., de Boer, G., Telg, H., Mei, F., Dexheimer, D., Shupe, M. D., Solomon, A., and McComiskey, A.: Assessing  
the vertical structure of Arctic aerosols using balloon-borne measurements, *Atmos. Chem. Phys.*, 21, 1737-1757, 10.5194/acp-  
520 21-1737-2021, 2021.
- Cristina, M., Mei, F., Ermold, B., & Mehta, H. Navigational Location, Motion, and Attitude for Airborne Platforms  
(AAFNAVAIMS). Atmospheric Radiation Measurement (ARM) User Facility. <https://doi.org/10.5439/1238157>, 2023
- Cromwell, E., Flynn, D., & Zhang, D. Micropulse Lidar Cloud Mask Machine Learning VAP (MPLCMASKML).  
Atmospheric Radiation Measurement (ARM) User Facility. <https://doi.org/10.5439/1637940>, 2023a
- 525 Cromwell, E., Newsom, R., Zhang, D., & Chand, D. Raman Lidar Vertical Profiles Feature Detection and Extinction  
(RLPROFFEX1THOR). Atmospheric Radiation Measurement (ARM) User Facility. <https://doi.org/10.5439/1373934>, 2023b
- Delle Monache, L., Perry, K. D., Cederwall, R. T., and Ogren, J. A.: In situ aerosol profiles over the Southern Great Plains  
cloud and radiation test bed site: 2. Effects of mixing height on aerosol properties, *Journal of Geophysical Research:  
Atmospheres*, 109, <https://doi.org/10.1029/2003JD004024>, 2004.
- 530 Dexheimer, D., Airey, M., Roesler, E., Longbottom, C., Nicoll, K., Kneifel, S., Mei, F., Harrison, R. G., Marlton, G., and  
Williams, P. D.: Evaluation of ARM tethered-balloon system instrumentation for supercooled liquid water and distributed  
temperature sensing in mixed-phase Arctic clouds, *Atmos. Meas. Tech.*, 12, 6845-6864, 10.5194/amt-12-6845-2019, 2019.
- Dupont, J.-C., Haeffelin, M., Morille, Y., Comstock, J. M., Flynn, C., Long, C. N., Sivaraman, C., and Newsom, R. K.: Cloud  
properties derived from two lidars over the ARM SGP site, *Geophysical Research Letters*, 38,  
535 <https://doi.org/10.1029/2010GL046274>, 2011.
- Endo, S., Fridlind, A. M., Lin, W., Vogelmann, A. M., Toto, T., Ackerman, A. S., McFarquhar, G. M., Jackson, R. C., Jonsson,  
H. H., and Liu, Y.: RACORO continental boundary layer cloud investigations: 2. Large-eddy simulations of cumulus clouds

and evaluation with in situ and ground-based observations, *Journal of Geophysical Research: Atmospheres*, 120, 5993-6014, <https://doi.org/10.1002/2014JD022525>, 2015.

540 Fast, J. D., Berg, L. K., Alexander, L., Bell, D., D'Ambro, E., Hubbe, J., Kuang, C., Liu, J., Long, C., Matthews, A., Mei, F., Newsom, R., Pekour, M., Pinterich, T., Schmid, B., Schobesberger, S., Shilling, J., Smith, J. N., Springston, S., Suski, K., Thornton, J. A., Tomlinson, J., Wang, J., Xiao, H., and Zelenyuk, A.: Overview of the HI-SCALE Field Campaign: A New Perspective on Shallow Convective Clouds, *Bulletin of the American Meteorological Society*, 100, 821-840, <https://doi.org/10.1175/BAMS-D-18-0030.1>, 2019.

545 Fast, J. D., Bell, D. M., Kulkarni, G., Liu, J., Mei, F., Saliba, G., Shilling, J. E., Suski, K., Tomlinson, J., Wang, J., Zaveri, R., and Zelenyuk, A.: Using aircraft measurements to characterize subgrid-scale variability of aerosol properties near the Atmospheric Radiation Measurement Southern Great Plains site, *Atmos. Chem. Phys.*, 22, 11217-11238, [10.5194/acp-22-11217-2022](https://doi.org/10.5194/acp-22-11217-2022), 2022.

Feingold, G., Furrer, R., Pilewskie, P., Remer, L. A., Min, Q., and Jonsson, H.: Aerosol indirect effect studies at Southern  
550 Great Plains during the May 2003 Intensive Operations Period, *Journal of Geophysical Research: Atmospheres*, 111, <https://doi.org/10.1029/2004JD005648>, 2006.

Flynn, D., Shi, Y., Lim, K.-S., and Riihimaki, L.: Cloud Type Classification (cldtype) Value-Added Product, ARM Climate Research Facility, Pacific Northwest National Laboratory, Richland, WA, United States, Medium: ED; Size: 16 p., 2017.

Flynn, D., Cromwell, E., and Zhang, D.: Micropulse Lidar Cloud Mask Machine-Learning Value-Added Product Report,  
555 United States, Medium: ED; Size: 17 p., 2023.

Gartzke, J., Knuteson, R., Przybyl, G., Ackerman, S., and Revercomb, H.: Comparison of Satellite-, Model-, and Radiosonde-Derived Convective Available Potential Energy in the Southern Great Plains Region, *Journal of Applied Meteorology and Climatology*, 56, 1499-1513, <https://doi.org/10.1175/JAMC-D-16-0267.1>, 2017.

Geerts, B., Raymond, D. J., Grubišić, V., Davis, C. A., Barth, M. C., Detwiler, A., Klein, P. M., Lee, W.-C., Markowski, P.,  
560 M., Mullendore, G. L., and Moore, J. A.: Recommendations for In Situ and Remote Sensing Capabilities in Atmospheric Convection and Turbulence, *Bulletin of the American Meteorological Society*, 99, 2463-2470, <https://doi.org/10.1175/BAMS-D-17-0310.1>, 2018.



- Ghan, S. J., and Collins, D. R.: Use of In Situ Data to Test a Raman Lidar–Based Cloud Condensation Nuclei Remote Sensing Method, *Journal of Atmospheric and Oceanic Technology*, 21, 387-394, [https://doi.org/10.1175/1520-0426\(2004\)021<0387:UOISDT>2.0.CO;2](https://doi.org/10.1175/1520-0426(2004)021<0387:UOISDT>2.0.CO;2), 2004.
- Ghan, S. J., Rissman, T. A., Elleman, R., Ferrare, R. A., Turner, D., Flynn, C., Wang, J., Ogren, J., Hudson, J., Jonsson, H. H., VanReken, T., Flagan, R. C., and Seinfeld, J. H.: Use of in situ cloud condensation nuclei, extinction, and aerosol size distribution measurements to test a method for retrieving cloud condensation nuclei profiles from surface measurements, *Journal of Geophysical Research: Atmospheres*, 111, <https://doi.org/10.1029/2004JD005752>, 2006.
- 570 Ghan, S. J., and Schwartz, S. E.: Aerosol Properties and Processes: A Path from Field and Laboratory Measurements to Global Climate Models, *Bulletin of the American Meteorological Society*, 88, 1059-1084, <https://doi.org/10.1175/BAMS-88-7-1059>, 2007
- Gibler, G., Mei, F., & Stephenson, J. Tricolor Absorption Photometer aboard aircraft (AAFSTAP). Atmospheric Radiation Measurement (ARM) User Facility. <https://doi.org/10.5439/1838697>, 2023a.
- 575 Gibler, G., Mei, F., & Stephenson, J. Optical Particle Counter aboard aircraft (AAFMOPC). Atmospheric Radiation Measurement (ARM) User Facility. <https://doi.org/10.5439/1838698>, 2023b
- Gibler, G., Glienke, S., & Mei, F. Cloud Droplet Probe aboard aircraft (AAFCDP). Atmospheric Radiation Measurement (ARM) User Facility. <https://doi.org/10.5439/1561461>, 2023c
- Jensen, M. P., Holdridge, D. J., Survo, P., Lehtinen, R., Baxter, S., Toto, T., and Johnson, K. L.: Comparison of Vaisala radiosondes RS41 and RS92 at the ARM Southern Great Plains site, *Atmos. Meas. Tech.*, 9, 3115-3129, [10.5194/amt-9-3115-2016](https://doi.org/10.5194/amt-9-3115-2016), 2016.
- 580
- Kelley, M. C., and Ardon-Dryer, K.: Analyzing two decades of dust events on the Southern Great Plains region of West Texas, *Atmospheric Pollution Research*, 12, 101091, <https://doi.org/10.1016/j.apr.2021.101091>, 2021.
- Kennedy, A. D., Dong, X., and Xi, B.: Cloud fraction at the ARM SGP site, *Theoretical and Applied Climatology*, 115, 91-105, [10.1007/s00704-013-0853-9](https://doi.org/10.1007/s00704-013-0853-9), 2014.
- 585



- Knobelspiesse, K. D., Cairns, B., Schmid, B., Román, M. O., and Schaaf, C. B.: Surface BRDF estimation from an aircraft compared to MODIS and ground estimates at the Southern Great Plains site, *Journal of Geophysical Research: Atmospheres*, 113, <https://doi.org/10.1029/2008JD010062>, 2008.
- 590 Koontz, A., Mei, F., Tomlinson, J., & Mehta, H. Meteorological Instrumentation aboard Aircraft (AAFMETAIMS). Atmospheric Radiation Measurement (ARM) User Facility. <https://doi.org/10.5439/1349241>, 2023
- Kulkarni, G., Mei, F., Shilling, J. E., Wang, J., Revegino, R. P., Flynn, C., Zelenyuk, A., and Fast, J.: Cloud Condensation Nuclei Closure Study Using Airborne Measurements Over the Southern Great Plains, *Journal of Geophysical Research: Atmospheres*, 128, e2022JD037964, <https://doi.org/10.1029/2022JD037964>, 2023a.
- 595 Kulkarni, G., Sivaraman, C., and Shilling, J. E.: Retrieved Number Concentration of Cloud Condensation Nuclei (RNCCN) Profile Value-Added Product Report., ARM user facility, DOE/SC-ARM-TR-292, 2023b.
- Lata, N. N., Cheng, Z., Dexheimer, D., Zhang, D., Mei, F., and China, S.: Vertical Gradient of Size-Resolved Aerosol Compositions over the Arctic Reveals Cloud Processed Aerosol in-Cloud and above Cloud, *Environmental Science & Technology*, 57, 5821-5830, [10.1021/acs.est.2c09498](https://doi.org/10.1021/acs.est.2c09498), 2023.
- 600 Li, J., Carlson, B. E., Yung, Y. L., Lv, D., Hansen, J., Penner, J. E., Liao, H., Ramaswamy, V., Kahn, R. A., Zhang, P., Dubovik, O., Ding, A., Laci, A. A., Zhang, L., and Dong, Y.: Scattering and absorbing aerosols in the climate system, *Nature Reviews Earth & Environment*, 3, 363-379, [10.1038/s43017-022-00296-7](https://doi.org/10.1038/s43017-022-00296-7), 2022.
- Li, Y., Pöschl, U., and Shiraiwa, M.: Molecular corridors and parameterizations of volatility in the chemical evolution of organic aerosols, *Atmos. Chem. Phys.*, 16, 3327-3344, [10.5194/acp-16-3327-2016](https://doi.org/10.5194/acp-16-3327-2016), 2016.
- 605 Liu, J., Alexander, L., Fast, J. D., Lindenmaier, R., and Shilling, J. E.: Aerosol characteristics at the Southern Great Plains site during the HI-SCALE campaign, *Atmospheric Chemistry and Physics*, 21, 5101-5116, 2021.
- Lowe, S. J., Partridge, D. G., Davies, J. F., Wilson, K. R., Topping, D., and Riipinen, I.: Key drivers of cloud response to surface-active organics, *Nature Communications*, 10, 5214, [10.1038/s41467-019-12982-0](https://doi.org/10.1038/s41467-019-12982-0), 2019.



Lu, C., Liu, Y., Zhang, G. J., Wu, X., Endo, S., Cao, L., Li, Y., and Guo, X.: Improving Parameterization of Entrainment Rate for Shallow Convection with Aircraft Measurements and Large-Eddy Simulation, *Journal of the Atmospheric Sciences*, 73, 610 761-773, <https://doi.org/10.1175/JAS-D-15-0050.1>, 2016.

Mansoura, X. C., Zezhen; Vandergrift, Gregory; Lata, Nurun Nahar; Sola, Valentina; Lai, Zhenli; Rahman, Ashfiqur; Dhas, Jeffery; Zhu, Zihua; Zhang, Damao; Mei, Fan; China, Swarup Vertical profile of the chemical composition and mixing state of summertime ambient aerosols in the Southern Great Plains *Environmental Science & Technology*, 2024.

McComiskey, A., and Ferrare, R. A.: Aerosol Physical and Optical Properties and Processes in the ARM Program, *Meteorological Monographs*, 57, 21.21-21.17, <https://doi.org/10.1175/AMSMONOGRAPHS-D-15-0028.1>, 2016. 615

Mei, F., Setyan, A., Zhang, Q., Wang, J. J. A. C., and Physics: CCN activity of organic aerosols observed downwind of urban emissions during CARES, 13, 12155-12169, 2013.

Mei, F., Pekour, M. S., Dexheimer, D., de Boer, G., Cook, R., Tomlinson, J., Schmid, B., Goldberger, L. A., Newsom, R., and Fast, J. D.: Observational data from uncrewed systems over Southern Great Plains, *Earth Syst. Sci. Data*, 14, 3423-3438, [10.5194/essd-14-3423-2022](https://doi.org/10.5194/essd-14-3423-2022), 2022. 620

Mei, F., Ermold, B., & Mehta, H. Navigational Location, Motion, and Attitude for Airborne Platforms (AAFNAV). Atmospheric Radiation Measurement (ARM) User Facility. <https://doi.org/10.5439/1339718>, 2023a

Mei, F., Ermold, B., & Mehta, H. Navigational Location, Motion, and Attitude for Airborne Platforms (AAFNAVVEC). Atmospheric Radiation Measurement (ARM) User Facility. <https://doi.org/10.5439/1238153>, 2023b

625 Mei, F., & Ermold, B. portable optical particle spectrometer aboard an airborne platform (AAFPOPS). Atmospheric Radiation Measurement (ARM) User Facility. <https://doi.org/10.5439/2322345>, 2023c

Mei, F., & Ermold, B. Aircraft Integrated Meteorological Measurement System aboard aircraft (AAFMETAIMS100HZ). Atmospheric Radiation Measurement (ARM) User Facility. <https://doi.org/10.5439/2204047>, 2023d

630 Mei, F., & Ermold, B. Aircraft Integrated Meteorological Measurement System aboard aircraft (AAFNAVAIMS100HZ). Atmospheric Radiation Measurement (ARM) User Facility. <https://doi.org/10.5439/2204048>, 2023e



- Mei, F., Wang, H., Zhu, Z., Zhang, D., Zhang, Q., Fast, J. D., Gustafson, W. I., Li, X.-Y., Schmid, B., Niedeck, C., Tomlinson, J., and Flynn, C.: Bridging New Observational Capabilities and Process-Level Simulation: Insights into Aerosol Roles in the Earth System, *Bulletin of the American Meteorological Society*, 105, E709-E724, <https://doi.org/10.1175/BAMS-D-23-0110.1>, 2024.
- 635 Morris, V., Ermold, B., Zhang, D., & Shi, Y. Boundary-layer height data with CEIL (CEILPBLHT). *Atmospheric Radiation Measurement (ARM) User Facility*. <https://doi.org/10.5439/1095593>, 2023.
- Mullens, E. D., and McPherson, R. A.: Quantitative scenarios for future hydrologic extremes in the U.S. Southern Great Plains, *International Journal of Climatology*, 39, 2659-2676, <https://doi.org/10.1002/joc.5979>, 2019.
- Naud, C. M., Muller, J.-P., and Clothiaux, E. E.: Comparison between active sensor and radiosonde cloud boundaries over the  
640 ARM Southern Great Plains site, *Journal of Geophysical Research: Atmospheres*, 108, <https://doi.org/10.1029/2002JD002887>, 2003.
- Niedeck, C. M., F.; Jiang, W.; Trousdell, J.; Zawadowicz, M.; Schmid, B.; and Zhang, Q.: Advancing aerosol chemical characterization and vertical profiling over the Southern Great Plains via integrated uncrewed aerial sampling and aerosol mass spectrometry analyses, *ACS Environmental Science & Technology – Air*, 2024.
- 645 Niedeck, C. R., Mei, F., Zawadowicz, M. A., Zhu, Z., Schmid, B., and Zhang, Q.: Quantitative Chemical Assay of Nanogram-Level PM Using Aerosol Mass Spectrometry: Characterization of Particles Collected from Uncrewed Atmospheric Measurement Platforms, *Atmos. Meas. Tech. Discuss.*, 2022, 1-23, [10.5194/amt-2022-246](https://doi.org/10.5194/amt-2022-246), 2022.
- Ou, S. C., Chen, Y., Liou, K. N., Cosh, M., and Brutsaert, W.: Satellite remote sensing of land surface temperatures: Application of the atmospheric correction method and split-window technique to data of ARM-SGP site, *International Journal of Remote Sensing*, 23, 5177-5192, [10.1080/01431160110115050](https://doi.org/10.1080/01431160110115050), 2002.  
650
- Parworth, C., Fast, J., Mei, F., Shippert, T., Sivaraman, C., Tilp, A., Watson, T., and Zhang, Q.: Long-term measurements of submicrometer aerosol chemistry at the Southern Great Plains (SGP) using an Aerosol Chemical Speciation Monitor (ACSM), *Atmospheric Environment*, 106, 43-55, <https://doi.org/10.1016/j.atmosenv.2015.01.060>, 2015.
- Petters, M. D., and Kreidenweis, S. M.: A single parameter representation of hygroscopic growth and cloud condensation  
655 nucleus activity, *Atmospheric Chemistry and Physics*, 7, 1961-1971, DOI [10.5194/acp-7-1961-2007](https://doi.org/10.5194/acp-7-1961-2007), 2007.



Phillips, T. J., and Klein, S. A.: Land-atmosphere coupling manifested in warm-season observations on the U.S. southern great plains, *Journal of Geophysical Research: Atmospheres*, 119, 509-528, <https://doi.org/10.1002/2013JD020492>, 2014.

660 Phillips, T. J., Klein, S. A., Ma, H.-Y., Tang, Q., Xie, S., Williams, I. N., Santanello, J. A., Cook, D. R., and Torn, M. S.: Using ARM Observations to Evaluate Climate Model Simulations of Land-Atmosphere Coupling on the U.S. Southern Great Plains, *Journal of Geophysical Research: Atmospheres*, 122, 11,524-511,548, <https://doi.org/10.1002/2017JD027141>, 2017.

Rahman, M. M.: Recommendations on the measurement techniques of atmospheric pollutants from in situ and satellite observations: a review, *Arabian Journal of Geosciences*, 16, 326, [10.1007/s12517-023-11410-4](https://doi.org/10.1007/s12517-023-11410-4), 2023.

665 Riedi, J., Goloub, P., and Marchand, R. T.: Comparison of POLDER cloud phase retrievals to active remote sensors measurements at the ARM SGP site, *Geophysical Research Letters*, 28, 2185-2188, <https://doi.org/10.1029/2000GL012758>, 2001.

Roach, P. J., Laskin, J., and Laskin, A.: Molecular Characterization of Organic Aerosols Using Nanospray-Desorption/Electrospray Ionization-Mass Spectrometry, *Analytical Chemistry*, 82, 7979-7986, [10.1021/ac101449p](https://doi.org/10.1021/ac101449p), 2010.

670 Rosenfeld, D., Fischman, B., Zheng, Y., Goren, T., and Giguzin, D.: Combined satellite and radar retrievals of drop concentration and CCN at convective cloud base, *Geophysical Research Letters*, 41, 3259-3265, <https://doi.org/10.1002/2014GL059453>, 2014.

Ruehl, C. R., Davies, J. F., and Wilson, K. R.: An interfacial mechanism for cloud droplet formation on organic aerosols, *Science*, 351, 1447-1450, [doi:10.1126/science.aad4889](https://doi.org/10.1126/science.aad4889), 2016.

675 Schobesberger, S., D'Ambro, E. L., Vettikkat, L., Lee, B. H., Peng, Q., Bell, D. M., Shilling, J. E., Shrivastava, M., Pekour, M., Fast, J., and Thornton, J. A.: Airborne flux measurements of ammonia over the southern Great Plains using chemical ionization mass spectrometry, *Atmos. Meas. Tech.*, 16, 247-271, [10.5194/amt-16-247-2023](https://doi.org/10.5194/amt-16-247-2023), 2023.

680 Seinfeld, J. H., Bretherton, C., Carslaw, K. S., Coe, H., DeMott, P. J., Dunlea, E. J., Feingold, G., Ghan, S., Guenther, A. B., Kahn, R., Kraucunas, I., Kreidenweis, S. M., Molina, M. J., Nenes, A., Penner, J. E., Prather, K. A., Ramanathan, V., Ramaswamy, V., Rasch, P. J., Ravishankara, A. R., Rosenfeld, D., Stephens, G., and Wood, R.: Improving our fundamental understanding of the role of aerosol-cloud interactions in the climate system, *Proceedings of the National Academy of Sciences*, 113, 5781-5790, [doi:10.1073/pnas.1514043113](https://doi.org/10.1073/pnas.1514043113), 2016.

Silber, I., Comstock, J. M., Kiebert, M. R., and Russell, L. M.: ARMTRAJ: A Set of Multi-Purpose Trajectory Datasets Augmenting the Atmospheric Radiation Measurement (ARM) User Facility Measurements, *Earth Syst. Sci. Data Discuss.*, 2024, 1-18, 10.5194/essd-2024-127, 2024.

685 Sisterson, D. L., Pepler, R. A., Cress, T. S., Lamb, P. J., and Turner, D. D.: The ARM Southern Great Plains (SGP) Site, *Meteorological Monographs*, 57, 6.1-6.14, <https://doi.org/10.1175/AMSMONOGRAPHS-D-16-0004.1>, 2016.

Sivaraman, C., McFarlane, S., Chapman, E., Jensen, M., Toto, T., Liu, S., and Fischer, M.: Planetary Boundary Layer Height (PBL) Value Added Product (VAP): Radiosonde Retrievals, ARM user facility, Pacific Northwest National Laboratory, Richland, WA, United States, Medium: ED; Size: 36 p., 2013.

690 Sivaraman, C., Shilling, J., & Kulkarni, G. Retrieved Number concentration of CCN (RNCCNPROF1KULKARNI). *Atmospheric Radiation Measurement (ARM) User Facility*. <https://doi.org/10.5439/1813858>, 2023

Song, J., Liao, K., Coulter, R. L., and Lesht, B. M.: Climatology of the Low-Level Jet at the Southern Great Plains Atmospheric Boundary Layer Experiments Site, *Journal of Applied Meteorology*, 44, 1593-1606, <https://doi.org/10.1175/JAM2294.1>, 2005.

705 Tao, C., Zhang, Y., Tang, S., Tang, Q., Ma, H.-Y., Xie, S., and Zhang, M.: Regional Moisture Budget and Land-Atmosphere Coupling Over the U.S. Southern Great Plains Inferred From the ARM Long-Term Observations, *Journal of Geophysical Research: Atmospheres*, 124, 10091-10108, <https://doi.org/10.1029/2019JD030585>, 2019.

700 Thalman, R., de Sa, S. S., Palm, B. B., Barbosa, H. M. J., Pohlker, M. L., Alexander, M. L., Brito, J., Carbone, S., Castillo, P., Day, D. A., Kuang, C. G., Manzi, A., Ng, N. L., Sedlacek, A. J., Souza, R., Springston, S., Watson, T., Pohlker, C., Poschl, U., Andreae, M. O., Artaxo, P., Jimenez, J. L., Martin, S. T., and Wang, J.: CCN activity and organic hygroscopicity of aerosols downwind of an urban region in central Amazonia: seasonal and diel variations and impact of anthropogenic emissions, *Atmospheric Chemistry and Physics*, 17, 11779-11801, 10.5194/acp-17-11779-2017, 2017.

Thorsen, T. J., and Fu, Q.: Automated retrieval of cloud and aerosol properties from the ARM Raman lidar. Part II: Extinction, *Journal of Atmospheric and Oceanic Technology*, 32, 1999-2023, 2015.

Turner, D., Goldsmith, J., and Ferrare, R.: Development and applications of the ARM Raman lidar, *Meteorological Monographs*, 57, 18.11-18.15, 2016.

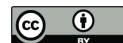

705 Turner, D. D., Ferrare, R. A., Wulfmeyer, V., and Scarino, A. J.: Aircraft Evaluation of Ground-Based Raman Lidar Water Vapor Turbulence Profiles in Convective Mixed Layers, *Journal of Atmospheric and Oceanic Technology*, 31, 1078-1088, <https://doi.org/10.1175/JTECH-D-13-00075.1>, 2014.

Vandergrift, G. W., Shawon, A. S. M., Dexheimer, D. N., Zawadowicz, M. A., Mei, F., and China, S.: Molecular Characterization of Organosulfate-Dominated Aerosols over Agricultural Fields from the Southern Great Plains by High-  
710 Resolution Mass Spectrometry, *ACS Earth and Space Chemistry*, 6, 1733-1741, 10.1021/acsearchspacechem.2c00043, 2022.

Vandergrift, G. W., Dexheimer, D. N., Zhang, D., Cheng, Z., Lata, N. N., Rogers, M. M., Shrivastava, M., Zhang, J., Gaudet, B. J., Mei, F., and China, S.: Tethered balloon system and High-Resolution Mass Spectrometry Reveal Increased Organonitrates Aloft Compared to the Ground Level, *Environmental Science & Technology*, 58, 10060-10071, 10.1021/acs.est.4c02090, 2024.

715 Vogelmann, A. M., McFarquhar, G. M., Ogren, J. A., Turner, D. D., Comstock, J. M., Feingold, G., Long, C. N., Jonsson, H. H., Bucholtz, A., Collins, D. R., Diskin, G. S., Gerber, H., Lawson, R. P., Woods, R. K., Andrews, E., Yang, H.-J., Chiu, J. C., Hartsock, D., Hubbe, J. M., Lo, C., Marshak, A., Monroe, J. W., McFarlane, S. A., Schmid, B., Tomlinson, J. M., and Toto, T.: RACORO Extended-Term Aircraft Observations of Boundary Layer Clouds, *Bulletin of the American Meteorological Society*, 93, 861-878, <https://doi.org/10.1175/BAMS-D-11-00189.1>, 2012.

720 Vömel, H., and Ingleby, B.: Chapter 2 - Balloon-borne radiosondes, in: *Field Measurements for Passive Environmental Remote Sensing*, edited by: Nalli, N. R., Elsevier, 23-35, 2023.

Wang, Y., Bagya Ramesh, C., Giangrande, S. E., Fast, J., Gong, X., Zhang, J., Tolga Odabasi, A., Oliveira, M. V. B., Matthews, A., Mei, F., Shilling, J. E., Tomlinson, J., Wang, D., and Wang, J.: Examining the vertical heterogeneity of aerosols over the Southern Great Plains, *Atmos. Chem. Phys.*, 23, 15671-15691, 10.5194/acp-23-15671-2023, 2023.

725 Wendisch, M., and Brenguier, J.-L.: *Airborne measurements for environmental research: methods and instruments*, John Wiley & Sons, 2013.

Williams, I. N., Lu, Y., Kueppers, L. M., Riley, W. J., Biraud, S. C., Bagley, J. E., and Torn, M. S.: Land-atmosphere coupling and climate prediction over the U.S. Southern Great Plains, *Journal of Geophysical Research: Atmospheres*, 121, 12,125-112,144, <https://doi.org/10.1002/2016JD025223>, 2016.



730 Zhang, D., Comstock, J., and Morris, V.: Comparison of planetary boundary layer height from ceilometer with ARM radiosonde data, *Atmos. Meas. Tech.*, 15, 4735-4749, 10.5194/amt-15-4735-2022, 2022.

Zhang, J., Li, Z., Chen, H., and Cribb, M.: Validation of a radiosonde-based cloud layer detection method against a ground-based remote sensing method at multiple ARM sites, *Journal of Geophysical Research: Atmospheres*, 118, 846-858, <https://doi.org/10.1029/2012JD018515>, 2013.

735 Zhang, D., Shi, Y., & Riihimaki, L. Cloud Type Classification (CLDTYPE). Atmospheric Radiation Measurement (ARM) User Facility. <https://doi.org/10.5439/1349884>, 2023a

Zhang, D., & Sivaraman, C. Planetary Boundary Layer Height (PBLHTRL1ZHANG). Atmospheric Radiation Measurement (ARM) User Facility. <https://doi.org/10.5439/2282350>, 2023b

740 Zheng, X., Xi, B., Dong, X., Logan, T., Wang, Y., and Wu, P.: Investigation of aerosol–cloud interactions under different absorptive aerosol regimes using Atmospheric Radiation Measurement (ARM) southern Great Plains (SGP) ground-based measurements, *Atmos. Chem. Phys.*, 20, 3483-3501, 10.5194/acp-20-3483-2020, 2020.
